# Supplementary material for: Isolation and characterization of Lactobacillus-derived membrane vesicles
Source: PubMed Central journal article supplement (PMC6351534; doi:10.1038/s41598-018-37120-6), 2019-01-29
Supplement: 41598_2018_37120_MOESM1_ESM.pdf [file 41598_2018_37120_MOESM1_ESM.pdf]

1 Isolation and characterization of *Lactobacillus*-derived membrane vesicles

2 Scott N. Dean<sup>1</sup>, Dagmar H. Leary<sup>2</sup>, Claretta J. Sullivan<sup>3</sup>, Eunkeu Oh<sup>4</sup>, Scott A. Walper<sup>2\*</sup>

3

4 <sup>1</sup> National Research Council Associate, Washington, DC, USA

5 <sup>2</sup> Center for Bio/Molecular Science & Engineering (Code 6900), US Naval Research Laboratory,  
6 Washington DC, USA

7 <sup>3</sup> Air Force Research Laboratory, Materials and Manufacturing Directorate, Wright-Patterson Air  
8 Force Base, Ohio, USA

9 <sup>4</sup> Sotera Defense Solutions, Inc. Columbia, MD, USA

10

11

12 \* Address correspondence to Scott A. Walper, [scott.walper@nrl.navy.mil](mailto:scott.walper@nrl.navy.mil)

13

14 **Supplemental material**  
15 *L. acidophilus*

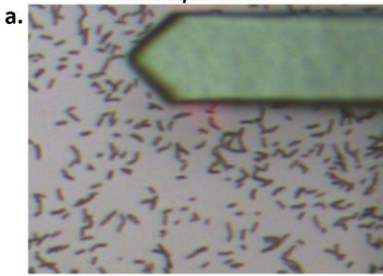

17 *L. casei*

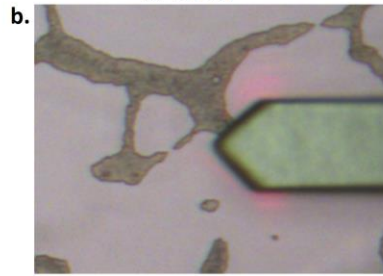

19 *L. reuteri*

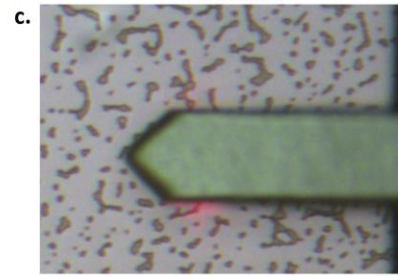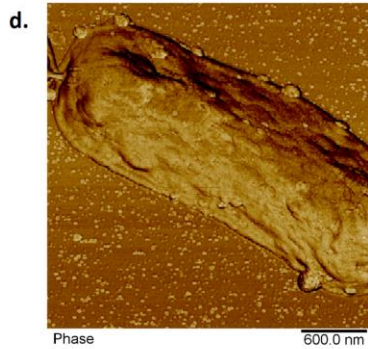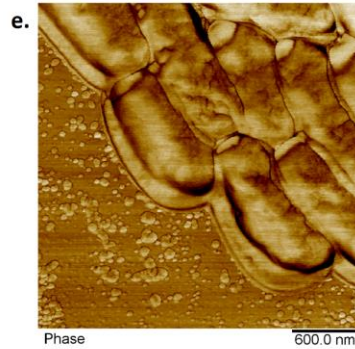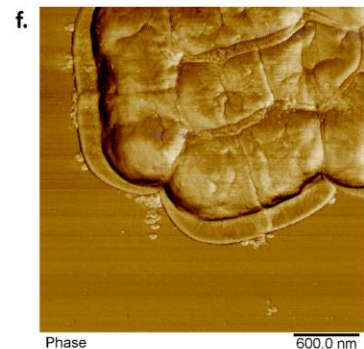

15  
16 **Fig. S1.**  
17 The AFM is equipped with an optical microscope to assist with locating the cantilever and selecting a  
18 region of interest. (a-c) Optical images of regions imaged in figure 1 show that *L. acidophilus* cells  
19 appear on the mica substrate more often as relatively large single cells whereas *L. casei* and *L. reuteri*  
20 were more likely to associate in 'pods' of cells. (d-e) Phase images that were acquired simultaneously  
21 with the amplitude images shown in figure 1, d-f.

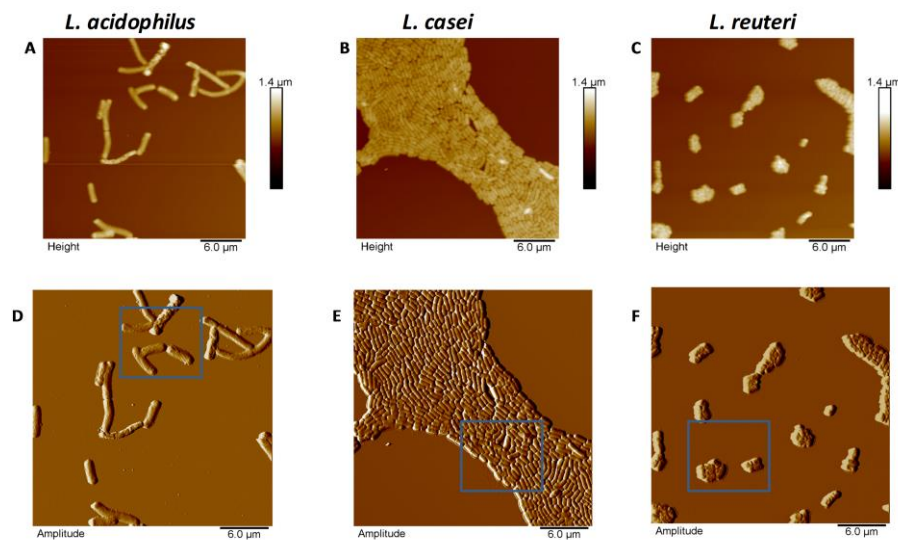

38 **Fig. S2.** Thirty micron height (A-C) and amplitude (D-F) images for a larger perspective of the  
39 regions shown in Fig. 1.

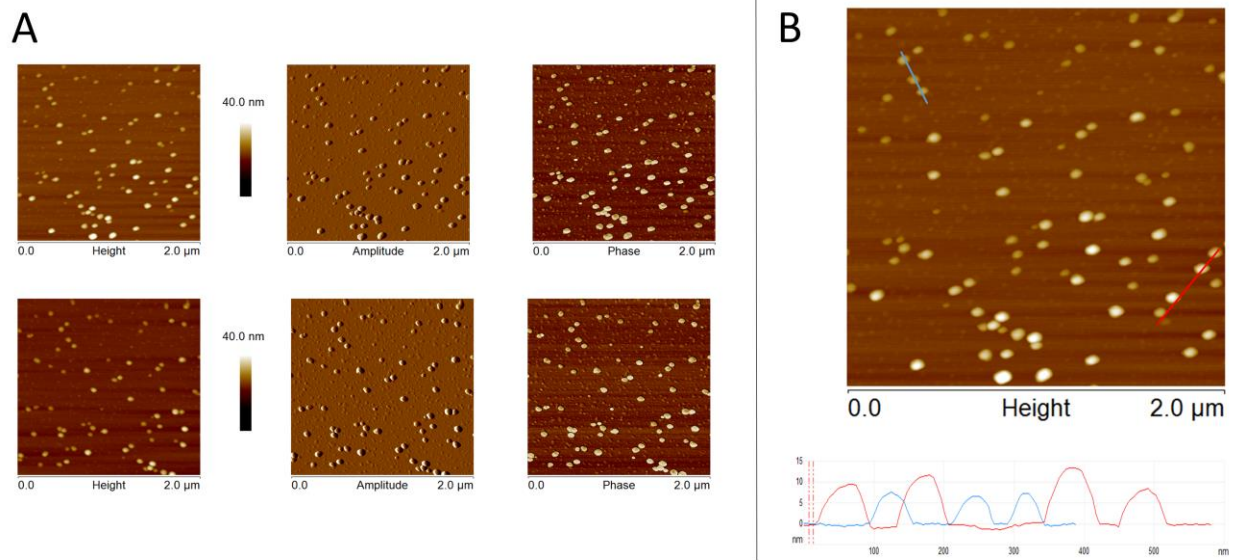

40  
 41 **Fig. S3.** Membrane vesicles from *L. casei* 60 h time point imaged using AFM (panel A). Isolated  
 42 MVs were measured using instrument software and some a size distribution consistent with those  
 43 results observed using the NanoSight particle tracking instrument and DLS (panel B). The trace  
 44 corresponds to particles on each of the lines in the image. The blue line highlights the smaller size  
 45 population which range in size from 15 – 50 nm while the red trace is for the larger particles that  
 46 were observed to be up to 400 nm in size.

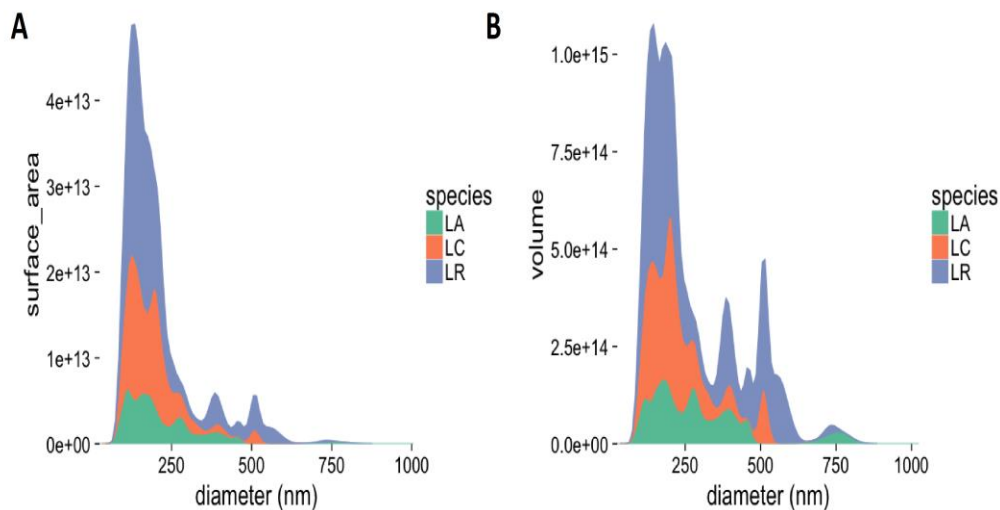

63  
 64 **Fig. S4.** Surface area (A) and volume (B) measurements of *L. acidophilus*, *L. casei*, and *L. reuteri*  
 65 from NanoSight experiments. Purified MVs were diluted in 1:100 or 1:1000 in PBS.  
 66 Measurements were performed in triplicate.

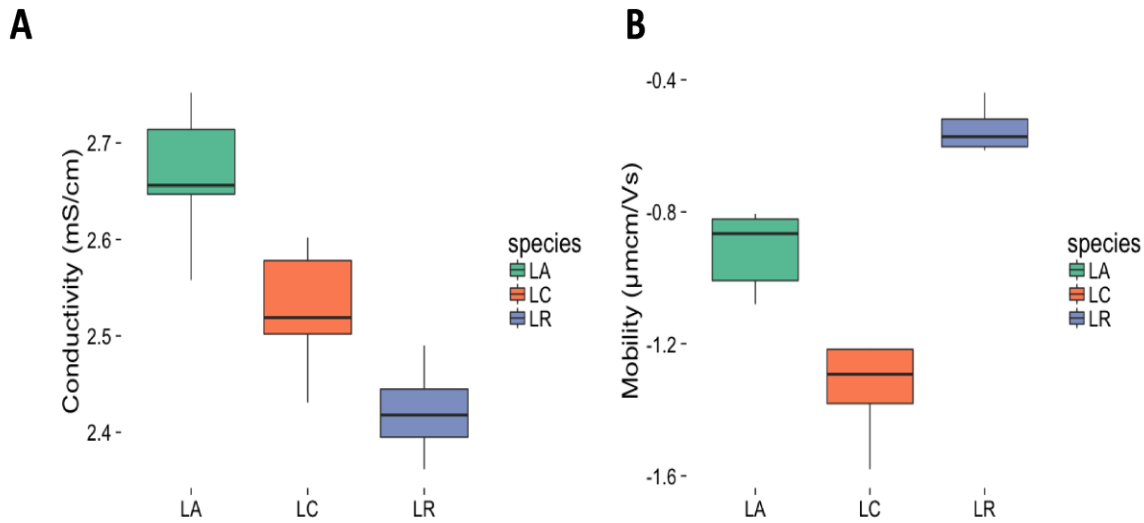

84 **Fig. S5.** Conductivity (A) and mobility (B) measurements of *L. acidophilus*, *L. casei*, and *L. reuteri*  
 85 from DLS experiments. Purified MVs were diluted in 0.1 x PBS. Measurements were performed  
 86 in triplicate.

87

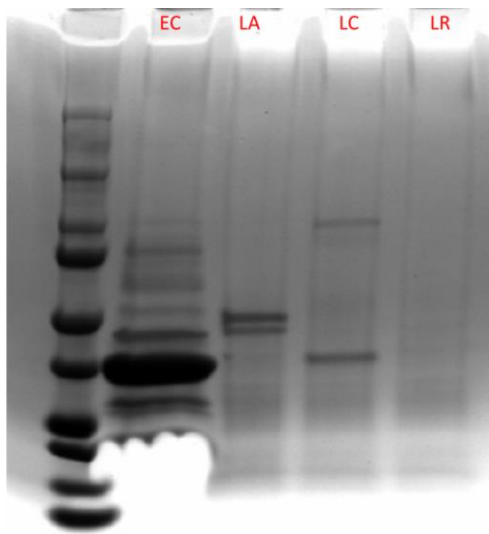

88 **Fig. S6.** SDS-PAGE of *Lactobacillus*-derived MV. Equivalent numbers of OMV/MV from  
 89 *Escherichia coli* (EC), *L. acidophilus* (LA), *L. casei* (LC), and *L. reuteri* (LR) were resolved on 4-  
 90 15% gradient polyacrylamide gels. Protein bands were visualized using GelCode staining reagent.  
 91

92

93

94

95

96

97

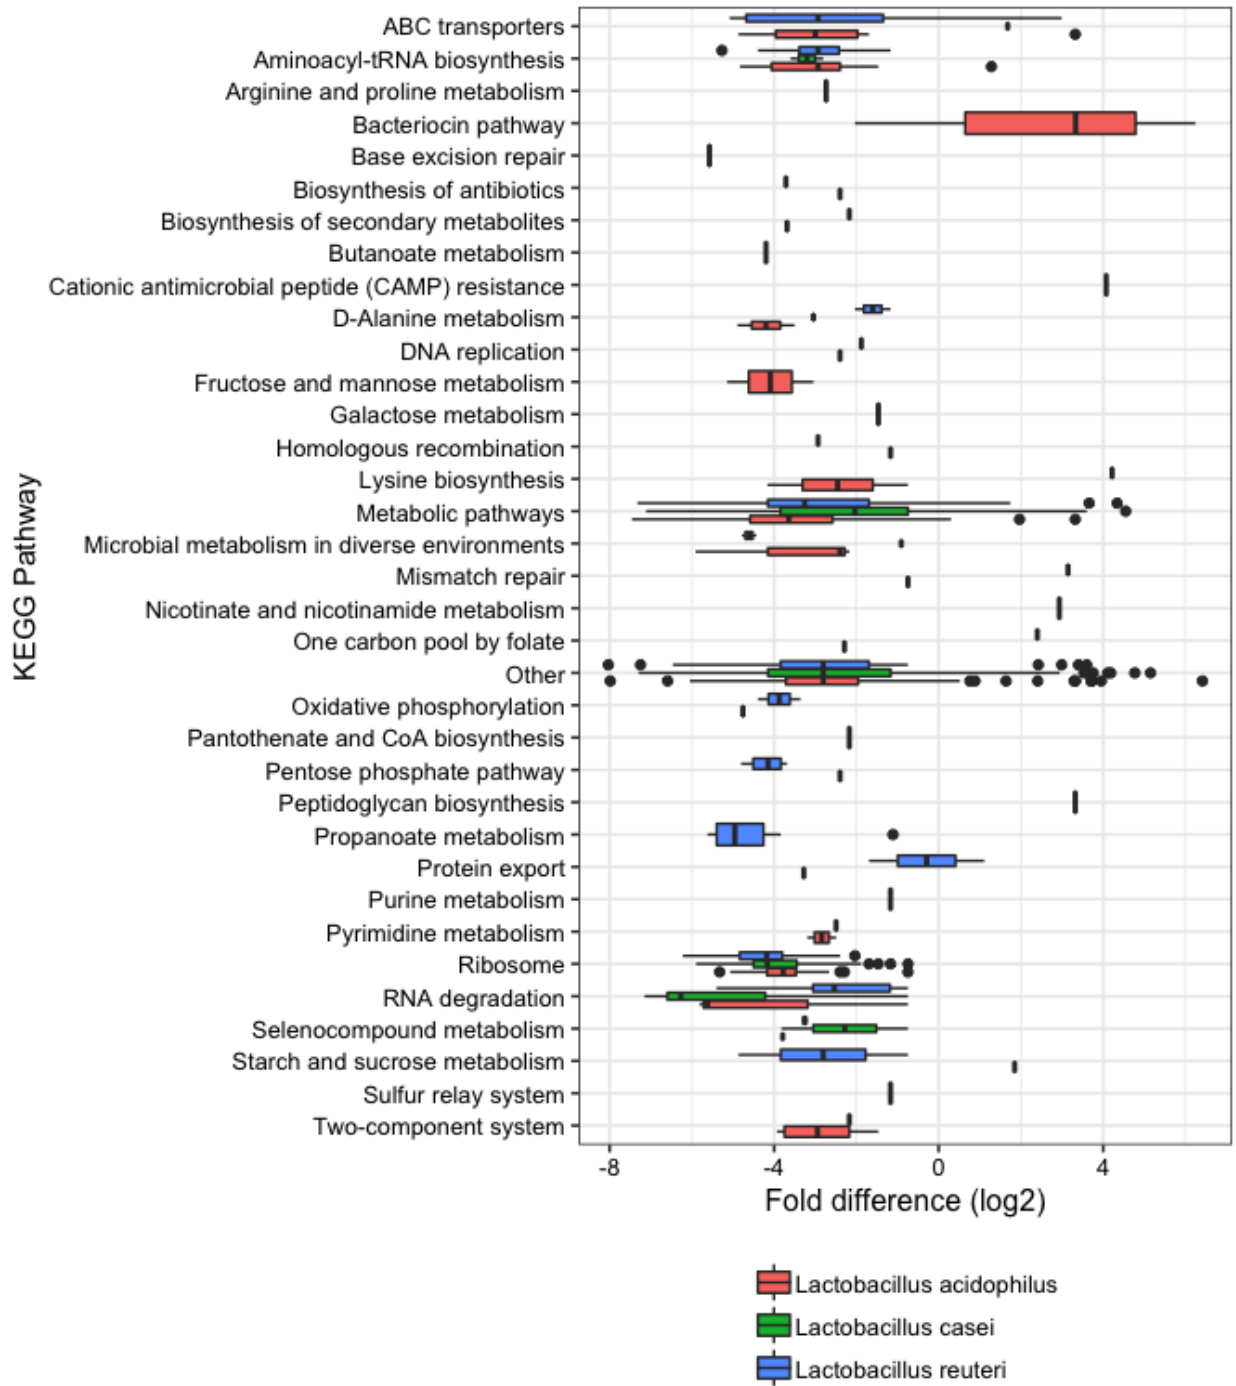

99  
100  
101  
102  
103  
104  
105

**Fig. S7** Box plot clustering of proteomics for the *lactobacillus* species MVs. Data is clustered according the pathway/cellular function/role for each of the species examined.

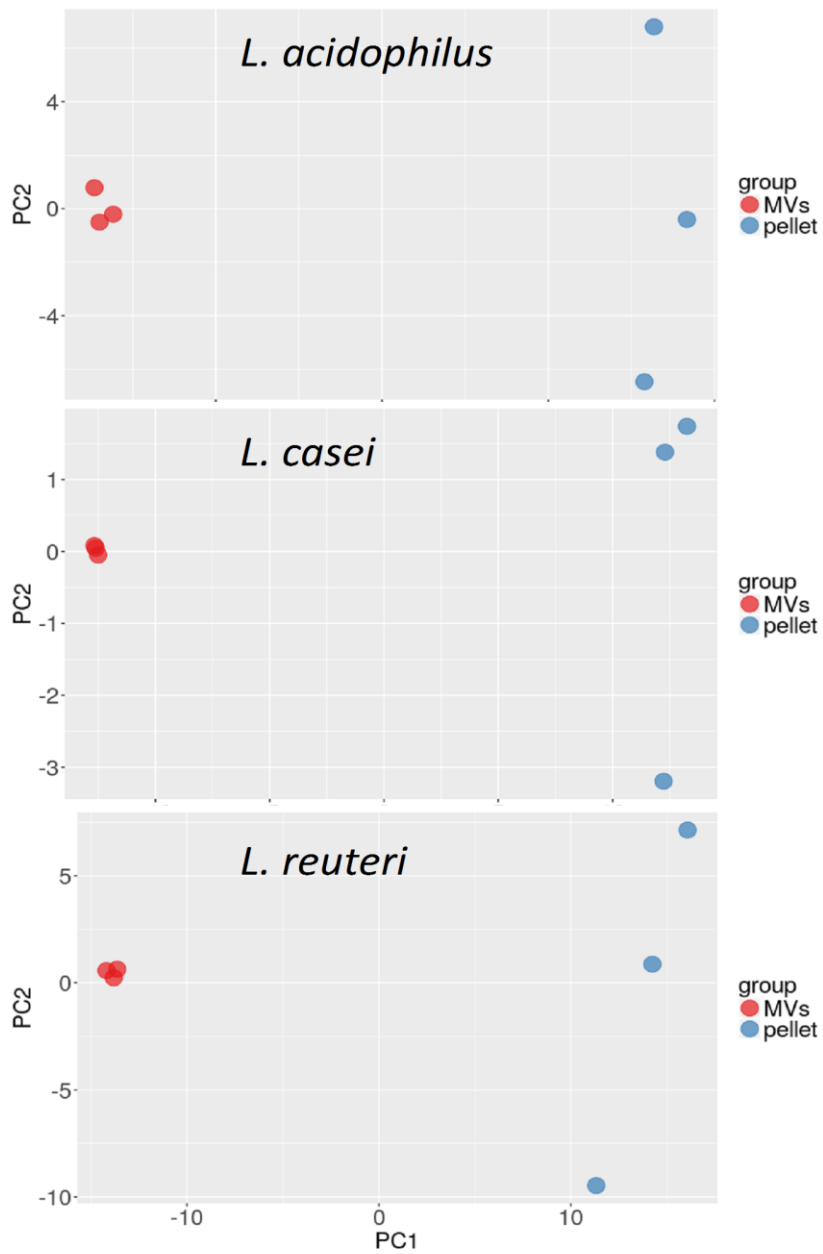

142

143 **Fig. S8.** Principal component analysis (PCA) on the proteomic data ( $n = 18$ ) used in the study.  
144 PCAs were performed on normalized weighted spectral counts and grouped based on identification  
145 in the MVs or pellet.  
146

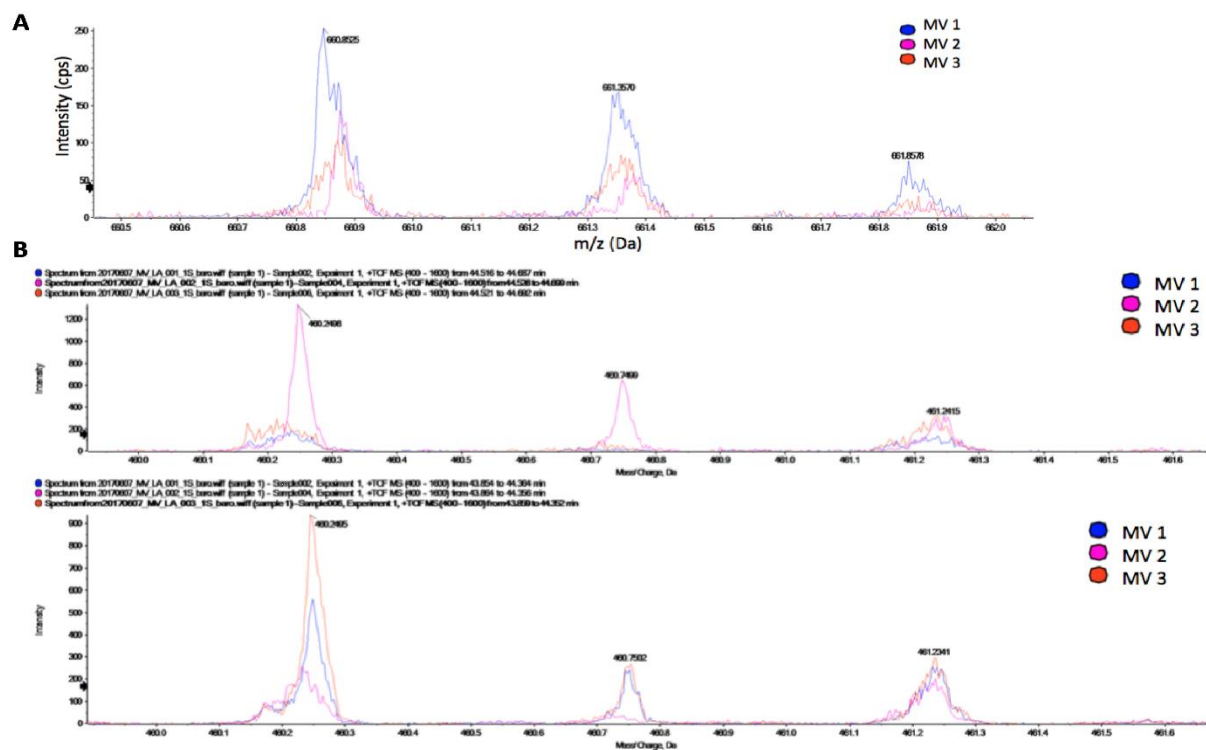

147 **Fig. S9.** (A) Precursor ion ((R)GLWENLSNIFK(H)) average MS spectra from retention time  
 148 range 78.24-78.38 min. (B) Precursor ion ((K)APISGYVGR(G)) average MS spectra from  
 149 retention time range 44.53-44.69 min (top) and 43.85-44.36 min (bottom), where the peptide in  
 150 sample MV2 was eluted slightly later than in the samples MV1 and MV3.

151  
152  
153  
154  
155

## 156 Supplemental methods

157

158 **Proteomics analysis.** Triplicate biological samples of MVs and bacterial pellets from *L.*  
 159 *acidophilus*, *L. casei*, and *L. reuteri* were harvested at 60 h. Pellets were lysed using OneShot  
 160 (Constant Systems Ltd., Daventry, UK) at 40 kpsi pressure in 10% n-propanol in 50 mM  
 161 ammonium bicarbonate (ABC) in a 10 mL suspension. The instrument was then washed with 10  
 162 mL ABC, the lysate and wash were combined, and then evaporated via speed-vac. Samples were  
 163 normalized by total protein content to 100 µg prior digestion using the Pierce BCA Protein Assay  
 164 Kit (Thermo Scientific, Rockford, IL). All samples were digested in solution with sequencing-  
 165 grade modified trypsin (Promega, Madison, WI) at a 1:30 w/w enzyme to substrate ratio in a  
 166 barocycler (Pressure Biosciences Inc., Easton, MA) for 90 min (90 cycles: 50 s on at 20 kpsi, 10 s  
 167 off). Digested samples (150 µL) were evaporated via speed-vac. MVs were solubilized in 10% n-  
 168 propanol, digested in solution and dried as described above for pellets. All dried samples were  
 169 stored at -20 °C until they were analyzed by LC-MS/MS. Immediately prior to analysis, samples

170 were solubilized in solvent A (0.1% formic acid (FA) in HPLC grade water) and 10  $\mu$ L of sample  
171 (~50  $\mu$ g of total protein) was injected into the LC-MS/MS system (Tempo-MDLC coupled to a  
172 TripleTOF 5600 mass spectrometer - Sciex, Foster City, CA). Peptides were loaded for 15 min in  
173 5% solvent B ((0.1% FA in acetonitrile) and 95% solvent A, separated on two Eksigent C18 Chrom  
174 XP columns (150 x 0.3 mm, 120 A) connected in a row using a linear gradient of increasing mobile  
175 phase B in the rate of 0.52% per minute. The 180 min LC method also included 10 min column  
176 wash at 80% B and re-equilibration of the columns with the starting condition at 5% solvent B.  
177 Mass spectrometry method consisted of two Experiments - 1. TOF experiment analyzing precursor  
178 ions (400-1600 Da) and 2. information dependent MS/MS experiment set to monitor m/z range of  
179 20-1600 Da. Seven highest precursor ions with intensities above 200 cps from Experiment 1 were  
180 submitted for analyses by Experiment 2. Precursor ions were excluded for 15 s after four repeated  
181 MS/MS experiments. Rolling collision energy was used for fragmentation. Analyst TF 1.7.1 was  
182 used as the acquisition software. Resulting MS/MS spectra were extracted by AB Sciex MS data  
183 convertor version 1.3 beta. Charge state deconvolution and deisotoping were not performed. All  
184 MS/MS samples were analyzed using Mascot (Matrix Science, London, UK; version 2.6.0) and  
185 X! Tandem (The GPM, thegpm.org; version CYCLONE (2010.12.01.1)). Mascot was set up to  
186 search the LacidoNCFM\_000 (1,859 sequences; 583,994 residues), LreuteDSM\_000 (1,865  
187 sequences; 559,402 residues), LactoCasei (152,421 sequences; 44,664,331 residues), respectively  
188 and 2016\_Contams\_STDs\_0000 database (190 sequences; 54,899 residues) assuming the  
189 digestion enzyme trypsin. X! Tandem was set up to search a reverse concatenated subset of the  
190 LacidoNCFM\_000 database which contained only proteins identified by Mascot in all analyzed  
191 samples.

192 Mascot and X! Tandem were searched with a fragment ion mass tolerance of 0.60 Da and a parent  
193 ion tolerance of 0.60 Da. Deamidation of asparagine and glutamine and oxidation of methionine  
194 were specified in Mascot as variable modifications. Glu->pyro-Glu of the n-terminus, ammonia-  
195 loss of the n-terminus, gln->pyro-Glu of the n-terminus, deamidated of asparagine and glutamine  
196 and oxidation of methionine were specified in X! Tandem as variable modifications. Scaffold  
197 (version Scaffold\_4.7.3, Proteome Software Inc., Portland, OR) was used to validate MS/MS  
198 based peptide and protein identifications. Peptide identifications were accepted if they could be  
199 established at greater than 70.0% probability by the Peptide Prophet algorithm (46) with Scaffold  
200 delta-mass correction. Protein identifications were accepted if they could be established at greater  
201 than 90.0% probability and contained at least 2 identified peptides. Protein probabilities were  
202 assigned by the Protein Prophet algorithm (41). Proteins that contained similar peptides and could  
203 not be differentiated based on MS/MS analysis alone were grouped to satisfy the principles of  
204 parsimony. Quantitative analysis was done in Scaffold using weighted spectra as an input. Only  
205 spectra satisfying the probability settings were considered for the analysis (lower scoring matches  
206 and probabilities <5% were not included).

207  
208 The Mascot database search protocol as output by Mascot:  
209 [L. acidophilus:(1010 entries) (only "20170607\_Pellet\_LA\_001\_1S\_baro (F007511)") also  
210 assuming trypsin, a reverse concatenated subset of the LacidoNCFM\_000 database (1018 entries)  
211 (only "20170607\_Pellet\_LA\_003\_1S\_baro (F007509)") also assuming trypsin, a reverse  
212 concatenated subset of the LacidoNCFM\_000 database (1026 entries) (only  
213 "20170607\_Pellet\_LA\_002\_1S\_baro (F007510)") also assuming a reverse concatenated subset of  
214 the LacidoNCFM\_000 database (1044 entries) (only "20170607\_MV\_LA\_001\_1S\_baro



215 (F007508)") also assuming trypsin, a reverse concatenated subset of the LacioNCFM\_000  
216 database (578 entries) (only "20170607\_MV\_LA\_002\_1S\_baro (F007507)") also assuming  
217 trypsin and a reverse concatenated subset of the LacioNCFM\_000 database (664 entries) (only  
218 "20170607\_MV\_LA\_003\_1S\_baro (F007506)")

219 L. Reuterii: X! Tandem was set up to search a reverse concatenated subset of the LreuteDSM\_000  
220 database (1040 entries) (only "20170612\_Pellet\_LR\_002\_1S\_baro (F007513)") also assuming  
221 trypsin, a reverse concatenated subset of the LreuteDSM\_000 database (unknown version, 1204  
222 entries) (only "20170612\_Pellet\_LR\_001\_1S\_baro (F007512)") also assuming trypsin, a reverse  
223 concatenated subset of the LreuteDSM\_000 database (unknown version, 458 entries) (only  
224 "20170612\_MV\_LR\_002\_1S\_baro (F007516)") also assuming trypsin, a reverse concatenated  
225 subset of the LreuteDSM\_000 database (unknown version, 466 entries) (only  
226 "20170612\_MV\_LR\_003\_1S\_baro (F007517)") also assuming trypsin, a reverse concatenated  
227 subset of the LreuteDSM\_000 database (unknown version, 632 entries) (only  
228 "20170612\_MV\_LR\_001\_1S\_baro (F007515)") also assuming trypsin and a reverse concatenated  
229 subset of the LreuteDSM\_000 database (unknown version, 968 entries) (only  
230 "20170612\_Pellet\_LR\_003\_1S\_baro (F007514)") also assuming trypsin. also assuming trypsin.

231 L. casei: X! Tandem was set up to search a reverse concatenated subset of the  
232 LactoCasei\_sequence database (21012 entries) (only "20170609\_Pellet\_LC\_003\_1S\_baro  
233 (F007482)") also assuming trypsin, a reverse concatenated subset of the LactoCasei\_sequence  
234 database (unknown version, 22064 entries) (only "20170609\_Pellet\_LC\_002\_1S\_baro  
235 (F007483)") also assuming trypsin, a reverse concatenated subset of the LactoCasei\_sequence  
236 database (unknown version, 22076 entries) (only "20170609\_Pellet\_LC\_001\_1S\_baro  
237 (F007484)") also assuming trypsin, a reverse concatenated subset of the LactoCasei\_sequence  
238 database (unknown version, 2692 entries) (only "20170609\_MV\_LC\_002\_1S\_baro (F007486)")  
239 also assuming trypsin, a reverse concatenated subset of the LactoCasei\_sequence database  
240 (unknown version, 3602 entries) (only "20170609\_MV\_LC\_003\_1S\_baro (F007485)") also  
241 assuming trypsin and a reverse concatenated subset of the LactoCasei\_sequence database  
242 (unknown version, 4068 entries) (only "20170609\_MV\_LC\_001\_1S\_baro (F007487)") also  
243 assuming trypsin  
244  
245
