# Supplementary material for: Isolation and characterization of Lactobacillus-derived membrane vesicles
Source: PubMed Central journal article supplement (PMC6351534; doi:10.1038/s41598-018-37120-6), 2019-01-29
Supplement: 41598_2018_37120_MOESM2_ESM.pdf [file 41598_2018_37120_MOESM2_ESM.pdf]

**Table S1.** List of proteins identified in MVs and pellet *Lactobacillus acidophilus*.

| Uniprot ID    | Locus ID | MV sample 1 | MV sample 2 | MV sample 3 | Pellet sample 1 | Pellet sample 2 | Pellet sample 3 |
|---------------|----------|-------------|-------------|-------------|-----------------|-----------------|-----------------|
| SLAP_LAC AC   | slpA     | 639         | 355         | 604         | 89              | 96              | 125             |
| Q5FL51_LA CAC | LBA0 698 | 591         | 400         | 593         | 325             | 468             | 378             |
| Q5FJA7_LA CAC | LBA1 392 | 265         | 30          | 253         | 0               | 0               | 0               |
| Q5FI65_LA CAC | LBA1 805 | 181         | 83          | 198         | 0               | 0               | 0               |
| Q5FLN0_L ACAC | slpX     | 84          | 98          | 165         | 5               | 3               | 4               |
| Q5FM30_L ACAC | LBA0 352 | 84          | 53          | 99          | 36              | 34              | 40              |
| Q5FI70_LA CAC | LBA1 800 | 121         | 0           | 99          | 3               | 2               | 2               |
| Y378_LAC AC   | LBA0 378 | 109         | 0           | 0           | 3               | 3               | 3               |
| GLMU_LA CAC   | glmU     | 84          | 0           | 0           | 3               | 4               | 4               |
| SYGB_LAC AC   | glyS     | 60          | 0           | 0           | 6               | 5               | 5               |
| Q5FJ08_LA CAC | LBA1 497 | 24          | 0           | 33          | 15              | 10              | 15              |
| Q5FIP8_LA CAC | fmtB     | 24          | 0           | 22          | 0               | 0               | 0               |
| Q5FKV1_L ACAC | ftsQ     | 36          | 0           | 0           | 0               | 0               | 0               |
| Q5FIG5_LA CAC | LBA1 697 | 36          | 0           | 0           | 0               | 0               | 0               |
| Q5FMN9_L ACAC | glnP     | 36          | 0           | 0           | 0               | 0               | 0               |
| Q5FHZ8_L ACAC | LBA1 876 | 36          | 0           | 0           | 0               | 0               | 0               |
| Q5FL54_LA CAC | LBA0 695 | 36          | 0           | 0           | 16              | 12              | 12              |
| GATB_LAC AC   | gatB     | 24          | 0           | 0           | 29              | 25              | 27              |
| Q5FKT1_L ACAC | bipA     | 24          | 0           | 0           | 24              | 24              | 20              |
| Q5FKG7_L ACAC | LBA0 955 | 24          | 0           | 0           | 0               | 0               | 0               |
| Q5FKA5_L ACAC | LBA1 020 | 24          | 0           | 0           | 0               | 0               | 0               |

|                  |             |    |    |   |     |     |     |
|------------------|-------------|----|----|---|-----|-----|-----|
| Q5FI08_LA<br>CAC | LBA1<br>866 | 24 | 0  | 0 | 0   | 0   | 0   |
| Q5FKV5_L<br>ACAC | LBA0<br>805 | 24 | 0  | 0 | 0   | 0   | 0   |
| Q5FI34_LA<br>CAC | LBA1<br>838 | 24 | 0  | 0 | 0   | 0   | 0   |
| GRPE_LAC<br>AC   | grpE        | 24 | 0  | 0 | 6   | 2   | 6   |
| Q5FM98_L<br>ACAC | clpC        | 0  | 23 | 0 | 2   | 4   | 3   |
| EFG_LACA<br>C    | fusA        | 0  | 0  | 0 | 72  | 71  | 70  |
| Q5FKF5_L<br>ACAC | LBA0<br>968 | 0  | 0  | 0 | 45  | 46  | 46  |
| Q5FHQ7_L<br>ACAC | poxB        | 0  | 0  | 0 | 77  | 75  | 75  |
| Q5FHW6_L<br>ACAC | clpE        | 0  | 0  | 0 | 214 | 221 | 219 |
| RL16_LAC<br>AC   | rplP        | 0  | 0  | 0 | 9   | 9   | 10  |
| Q5FI52_LA<br>CAC | LBA1<br>820 | 0  | 0  | 0 | 14  | 14  | 14  |
| Q5FIY9_LA<br>CAC | LBA1<br>516 | 0  | 0  | 0 | 10  | 10  | 10  |
| TPIS_LAC<br>AC   | tpiA        | 0  | 0  | 0 | 56  | 59  | 57  |
| Q5FLZ5_L<br>ACAC | LBA0<br>388 | 0  | 0  | 0 | 16  | 17  | 17  |
| RL9_LACA<br>C    | rplI        | 0  | 0  | 0 | 14  | 14  | 14  |
| Q5FLF9_L<br>ACAC | LBA0<br>585 | 0  | 0  | 0 | 20  | 21  | 21  |
| Q5FKG5_L<br>ACAC | kpyK        | 0  | 0  | 0 | 187 | 181 | 177 |
| CH10_LAC<br>AC   | groS        | 0  | 0  | 0 | 19  | 19  | 20  |
| Q5FIM1_L<br>ACAC | LBA1<br>641 | 0  | 0  | 0 | 63  | 65  | 61  |
| TIG_LACA<br>C    | tig         | 0  | 0  | 0 | 96  | 94  | 100 |
| RL10_LAC<br>AC   | rplJ        | 0  | 0  | 0 | 19  | 18  | 19  |
| RL21_LAC<br>AC   | rplU        | 0  | 0  | 0 | 6   | 6   | 6   |
| Q5FIG3_LA<br>CAC | exoA        | 0  | 0  | 0 | 77  | 82  | 77  |

|                  |             |   |   |   |    |    |    |
|------------------|-------------|---|---|---|----|----|----|
| SYR_LACA<br>C    | argS        | 0 | 0 | 0 | 3  | 3  | 3  |
| PTH_LACA<br>C    | pth         | 0 | 0 | 0 | 2  | 2  | 2  |
| SYT_LACA<br>C    | thrS        | 0 | 0 | 0 | 39 | 37 | 36 |
| SYL_LACA<br>C    | leuS        | 0 | 0 | 0 | 4  | 4  | 4  |
| Q5FIA0_LA<br>CAC | pepF        | 0 | 0 | 0 | 2  | 2  | 2  |
| Q5FK82_L<br>ACAC | LBA1<br>046 | 0 | 0 | 0 | 1  | 1  | 1  |
| G6PL_LAC<br>AC   | pgi         | 0 | 0 | 0 | 84 | 80 | 86 |
| RL31B_LA<br>CAC  | rpmE2       | 0 | 0 | 0 | 10 | 9  | 10 |
| Q5FIY8_LA<br>CAC | greA        | 0 | 0 | 0 | 16 | 16 | 17 |
| Q5FJM6_L<br>ACAC | LBA1<br>267 | 0 | 0 | 0 | 13 | 13 | 14 |
| Q5FJ98_LA<br>CAC | LBA1<br>401 | 0 | 0 | 0 | 13 | 12 | 12 |
| RTPR_LAC<br>AC   | rtpR        | 0 | 0 | 0 | 87 | 88 | 81 |
| GLMM_LA<br>CAC   | glmM        | 0 | 0 | 0 | 13 | 12 | 12 |
| Q5FKK0_L<br>ACAC | citF        | 0 | 0 | 0 | 13 | 12 | 12 |
| RL22_LAC<br>AC   | rplV        | 0 | 0 | 0 | 12 | 11 | 11 |
| SYP_LACA<br>C    | proS        | 0 | 0 | 0 | 22 | 22 | 20 |
| Q5FMF7_L<br>ACAC | LBA0<br>222 | 0 | 0 | 0 | 27 | 30 | 30 |
| Q5FL15_LA<br>CAC | ackB        | 0 | 0 | 0 | 7  | 7  | 7  |
| EFP1_LAC<br>AC   | efp1        | 0 | 0 | 0 | 9  | 9  | 10 |
| Q5FMP2_L<br>ACAC | LBA0<br>131 | 0 | 0 | 0 | 20 | 20 | 18 |
| GPMA_LA<br>CAC   | gpmA        | 0 | 0 | 0 | 82 | 91 | 84 |
| Q5FKC3_L<br>ACAC | LBA1<br>001 | 0 | 0 | 0 | 10 | 9  | 9  |
| RS10_LAC<br>AC   | rpsJ        | 0 | 0 | 0 | 12 | 11 | 12 |

|                  |             |   |   |   |     |     |     |
|------------------|-------------|---|---|---|-----|-----|-----|
| EFTS_LAC<br>AC   | tsf         | 0 | 0 | 0 | 26  | 29  | 29  |
| Q5FLA7_L<br>ACAC | clpE        | 0 | 0 | 0 | 8   | 7   | 8   |
| Q5FLQ3_L<br>ACAC | LBA0<br>486 | 0 | 0 | 0 | 7   | 7   | 8   |
| Q5FJU8_LA<br>CAC | pepT        | 0 | 0 | 0 | 5   | 6   | 5   |
| CH60_LAC<br>AC   | groL        | 0 | 0 | 0 | 107 | 96  | 97  |
| LDH2_LAC<br>AC   | ldh2        | 0 | 0 | 0 | 9   | 8   | 9   |
| RL13_LAC<br>AC   | rplM        | 0 | 0 | 0 | 6   | 7   | 7   |
| Q5FJI5_LA<br>CAC | LBA1<br>310 | 0 | 0 | 0 | 20  | 19  | 22  |
| RL19_LAC<br>AC   | rplS        | 0 | 0 | 0 | 11  | 11  | 12  |
| Q5FKI3_LA<br>CAC | LBA0<br>937 | 0 | 0 | 0 | 17  | 15  | 15  |
| PGK_LACA<br>C    | pgk         | 0 | 0 | 0 | 140 | 143 | 158 |
| Q5FME3_L<br>ACAC | LBA0<br>236 | 0 | 0 | 0 | 10  | 12  | 10  |
| Q5FLA5_L<br>ACAC | ptsI        | 0 | 0 | 0 | 55  | 50  | 56  |
| Q5FI89_LA<br>CAC | fruK        | 0 | 0 | 0 | 54  | 47  | 52  |
| RL6_LACA<br>C    | rplF        | 0 | 0 | 0 | 47  | 41  | 46  |
| ATPB_LAC<br>AC   | atpD        | 0 | 0 | 0 | 37  | 36  | 33  |
| PYRH_LAC<br>AC   | pyrH        | 0 | 0 | 0 | 12  | 12  | 10  |
| Q5FJJ4_LA<br>CAC | oppA        | 0 | 0 | 0 | 35  | 32  | 30  |
| Q5FN08_L<br>ACAC | LBA0<br>008 | 0 | 0 | 0 | 3   | 3   | 3   |
| GLYA_LA<br>CAC   | glyA        | 0 | 0 | 0 | 13  | 15  | 14  |
| PDRP_LAC<br>AC   | LBA1<br>206 | 0 | 0 | 0 | 16  | 16  | 14  |
| Q5FKU9_L<br>ACAC | ftsZ        | 0 | 0 | 0 | 16  | 15  | 14  |
| Q5FHQ8_L<br>ACAC | LBA1<br>973 | 0 | 0 | 0 | 27  | 30  | 31  |

|                  |             |   |   |   |     |     |     |
|------------------|-------------|---|---|---|-----|-----|-----|
| Q5FI39_LA<br>CAC | LBA1<br>833 | 0 | 0 | 0 | 9   | 9   | 8   |
| Q5FLF7_L<br>ACAC | rbsK        | 0 | 0 | 0 | 14  | 15  | 16  |
| Q5FIZ4_LA<br>CAC | LBA1<br>511 | 0 | 0 | 0 | 16  | 17  | 18  |
| Q5FHV1_L<br>ACAC | dltA        | 0 | 0 | 0 | 40  | 37  | 42  |
| RL5_LACA<br>C    | rplE        | 0 | 0 | 0 | 26  | 30  | 29  |
| RL20_LAC<br>AC   | rplT        | 0 | 0 | 0 | 13  | 12  | 12  |
| RL27_LAC<br>AC   | rpmA        | 0 | 0 | 0 | 9   | 9   | 10  |
| Q5FJX9_LA<br>CAC | LBA1<br>156 | 0 | 0 | 0 | 4   | 5   | 5   |
| Q5FMH4_L<br>ACAC | LBA0<br>205 | 0 | 0 | 0 | 43  | 48  | 50  |
| DDL_LAC<br>AC    | ddl         | 0 | 0 | 0 | 32  | 33  | 29  |
| Q5FLX0_L<br>ACAC | zwf         | 0 | 0 | 0 | 18  | 18  | 16  |
| Q5FKM5_L<br>ACAC | LBA0<br>890 | 0 | 0 | 0 | 8   | 9   | 10  |
| MURC_LA<br>CAC   | murC        | 0 | 0 | 0 | 22  | 19  | 19  |
| Q5FMW5_L<br>ACAC | ldhD        | 0 | 0 | 0 | 121 | 104 | 106 |
| Q5FN14_L<br>ACAC | dnaN        | 0 | 0 | 0 | 6   | 6   | 5   |
| Y733_LAC<br>AC   | LBA0<br>733 | 0 | 0 | 0 | 6   | 7   | 7   |
| Q5FJ73_LA<br>CAC | LBA1<br>426 | 0 | 0 | 0 | 6   | 7   | 7   |
| Q5FLA6_L<br>ACAC | ptsH        | 0 | 0 | 0 | 41  | 36  | 43  |
| Q5FIK6_LA<br>CAC | LBA1<br>656 | 0 | 0 | 0 | 18  | 17  | 15  |
| EFP2_LAC<br>AC   | efp2        | 0 | 0 | 0 | 14  | 12  | 14  |
| EFTU_LAC<br>AC   | tuf         | 0 | 0 | 0 | 794 | 948 | 897 |
| RS2_LACA<br>C    | rpsB        | 0 | 0 | 0 | 38  | 32  | 33  |
| Q5FJG3_LA<br>CAC | LBA1<br>334 | 0 | 0 | 0 | 11  | 10  | 9   |

|                  |             |   |   |   |    |    |    |
|------------------|-------------|---|---|---|----|----|----|
| DNAK_LA<br>CAC   | dnaK        | 0 | 0 | 0 | 82 | 75 | 90 |
| Q5FIJ7_LA<br>CAC | oppA        | 0 | 0 | 0 | 42 | 39 | 35 |
| Q5FI23_LA<br>CAC | pepN        | 0 | 0 | 0 | 47 | 44 | 39 |
| Q5FLK4_L<br>ACAC | LBA0<br>539 | 0 | 0 | 0 | 6  | 5  | 5  |
| Q5FMX9_L<br>ACAC | LBA0<br>040 | 0 | 0 | 0 | 13 | 16 | 15 |
| SYE_LACA<br>C    | gltX        | 0 | 0 | 0 | 12 | 12 | 10 |
| KAD_LAC<br>AC    | adk         | 0 | 0 | 0 | 26 | 29 | 24 |
| RL18_LAC<br>AC   | rplR        | 0 | 0 | 0 | 42 | 35 | 38 |
| RPOA_LAC<br>AC   | rpoA        | 0 | 0 | 0 | 13 | 15 | 13 |
| Q5FLW8_L<br>ACAC | LBA0<br>415 | 0 | 0 | 0 | 39 | 40 | 34 |
| Q5FLK9_L<br>ACAC | LBA0<br>534 | 0 | 0 | 0 | 16 | 13 | 14 |
| Q5FI90_LA<br>CAC | fruA        | 0 | 0 | 0 | 42 | 46 | 38 |
| Q5FI97_LA<br>CAC | LBA1<br>769 | 0 | 0 | 0 | 29 | 24 | 25 |
| Q5FLE5_L<br>ACAC | LBA0<br>600 | 0 | 0 | 0 | 14 | 13 | 12 |
| RPOB_LAC<br>AC   | rpoB        | 0 | 0 | 0 | 32 | 29 | 27 |
| SYE_LACA<br>C    | tyrS        | 0 | 0 | 0 | 5  | 6  | 7  |
| Q5FN03_L<br>ACAC | LBA0<br>014 | 0 | 0 | 0 | 20 | 18 | 22 |
| Q5FL76_LA<br>CAC | yvyD        | 0 | 0 | 0 | 35 | 29 | 35 |
| RS3_LACA<br>C    | rpsC        | 0 | 0 | 0 | 13 | 13 | 11 |
| RS12_LAC<br>AC   | rpsL        | 0 | 0 | 0 | 15 | 12 | 13 |
| RS6_LACA<br>C    | rpsF        | 0 | 0 | 0 | 15 | 17 | 19 |
| Q5FMM2_L<br>ACAC | LBA0<br>151 | 0 | 0 | 0 | 8  | 6  | 7  |
| Q5FMY4_L<br>ACAC | LBA0<br>035 | 0 | 0 | 0 | 3  | 3  | 3  |

|                  |             |   |   |   |    |    |    |
|------------------|-------------|---|---|---|----|----|----|
| PFKA_LAC<br>AC   | pfkA        | 0 | 0 | 0 | 42 | 52 | 48 |
| Q5FKQ7_L<br>ACAC | LBA0<br>856 | 0 | 0 | 0 | 17 | 14 | 14 |
| RL23_LAC<br>AC   | rplW        | 0 | 0 | 0 | 10 | 11 | 12 |
| Q5FIS9_LA<br>CAC | LBA1<br>578 | 0 | 0 | 0 | 19 | 17 | 21 |
| Q5FM39_L<br>ACAC | LBA0<br>343 | 0 | 0 | 0 | 10 | 10 | 12 |
| RS7_LACA<br>C    | rpsG        | 0 | 0 | 0 | 41 | 50 | 51 |
| Q5FJF6_LA<br>CAC | ilvE        | 0 | 0 | 0 | 8  | 10 | 10 |
| Q5FMM8_L<br>ACAC | LBA0<br>145 | 0 | 0 | 0 | 8  | 7  | 6  |
| Q5FJX3_LA<br>CAC | LBA1<br>162 | 0 | 0 | 0 | 24 | 22 | 19 |
| Q5FLY7_L<br>ACAC | LBA0<br>396 | 0 | 0 | 0 | 63 | 53 | 51 |
| ATPF_LAC<br>AC   | atpF        | 0 | 0 | 0 | 11 | 12 | 9  |
| RL15_LAC<br>AC   | rplO        | 0 | 0 | 0 | 9  | 7  | 7  |
| GUAA_LA<br>CAC   | guaA        | 0 | 0 | 0 | 16 | 16 | 13 |
| ACP_LACA<br>C    | acpP        | 0 | 0 | 0 | 4  | 4  | 5  |
| GATC_LAC<br>AC   | gatC        | 0 | 0 | 0 | 6  | 6  | 7  |
| Q5FKW1_L<br>ACAC | mreB        | 0 | 0 | 0 | 32 | 27 | 27 |
| Q5FL45_LA<br>CAC | LBA0<br>704 | 0 | 0 | 0 | 13 | 13 | 15 |
| LUXS_LAC<br>AC   | luxS        | 0 | 0 | 0 | 5  | 6  | 5  |
| IF2_LACA<br>C    | infB        | 0 | 0 | 0 | 32 | 25 | 29 |
| PPAC_LAC<br>AC   | ppaC        | 0 | 0 | 0 | 38 | 30 | 36 |
| RL1_LACA<br>C    | rplA        | 0 | 0 | 0 | 27 | 25 | 31 |
| RL17_LAC<br>AC   | rplQ        | 0 | 0 | 0 | 17 | 21 | 20 |
| Q5FKK3_L<br>ACAC | citC        | 0 | 0 | 0 | 13 | 14 | 11 |

|                       |             |   |   |   |     |     |     |
|-----------------------|-------------|---|---|---|-----|-----|-----|
| Q5FLP2_L<br>ACAC      | LBA0<br>497 | 0 | 0 | 0 | 10  | 13  | 13  |
| Q5FIE2_LA<br>CAC (+1) | LBA1<br>720 | 0 | 0 | 0 | 8   | 10  | 10  |
| RPOC_LAC<br>AC        | rpoC        | 0 | 0 | 0 | 29  | 32  | 26  |
| MURD_LA<br>CAC        | murD        | 0 | 0 | 0 | 8   | 10  | 9   |
| RS8_LACA<br>C         | rpsH        | 0 | 0 | 0 | 19  | 15  | 18  |
| Q5FLS6_L<br>ACAC      | adhE        | 0 | 0 | 0 | 8   | 7   | 9   |
| UPP_LACA<br>C         | upp         | 0 | 0 | 0 | 22  | 19  | 18  |
| ATPG_LAC<br>AC        | atpG        | 0 | 0 | 0 | 3   | 4   | 4   |
| Q5FLT1_L<br>ACAC      | manN        | 0 | 0 | 0 | 2   | 2   | 2   |
| Q5FI48_LA<br>CAC      | ychF        | 0 | 0 | 0 | 19  | 17  | 15  |
| SYI_LACA<br>C         | ileS        | 0 | 0 | 0 | 2   | 3   | 2   |
| PURA_LAC<br>AC        | purA        | 0 | 0 | 0 | 24  | 25  | 19  |
| Q5FLC0_L<br>ACAC      | LBA0<br>625 | 0 | 0 | 0 | 32  | 32  | 26  |
| Q5FMI7_L<br>ACAC      | LBA0<br>191 | 0 | 0 | 0 | 24  | 23  | 18  |
| ERA_LACA<br>C         | era         | 0 | 0 | 0 | 19  | 15  | 17  |
| GATA_LA<br>CAC        | gatA        | 0 | 0 | 0 | 11  | 8   | 10  |
| DLTC_LAC<br>AC        | dltC        | 0 | 0 | 0 | 11  | 8   | 10  |
| RL2_LACA<br>C         | rplB        | 0 | 0 | 0 | 32  | 25  | 30  |
| SYC_LACA<br>C         | cysS        | 0 | 0 | 0 | 6   | 8   | 8   |
| Q5FJ04_LA<br>CAC      | glnA        | 0 | 0 | 0 | 53  | 63  | 70  |
| Q5FIR0_LA<br>CAC      | fbaA        | 0 | 0 | 0 | 126 | 155 | 167 |
| Q5FKF3_L<br>ACAC      | LBA0<br>970 | 0 | 0 | 0 | 108 | 128 | 144 |
| RL11_LAC<br>AC        | rplK        | 0 | 0 | 0 | 21  | 16  | 17  |



|                  |             |   |   |   |    |    |    |
|------------------|-------------|---|---|---|----|----|----|
| Q5FKQ1_L<br>ACAC | LBA0<br>864 | 0 | 0 | 0 | 22 | 17 | 18 |
| Q5FJB1_LA<br>CAC | LBA1<br>388 | 0 | 0 | 0 | 66 | 66 | 50 |
| Q5FMA0_L<br>ACAC | lysS        | 0 | 0 | 0 | 21 | 22 | 16 |
| Q5FKM3_L<br>ACAC | bshA        | 0 | 0 | 0 | 5  | 5  | 4  |
| Q5FM58_L<br>ACAC | rpsI        | 0 | 0 | 0 | 16 | 12 | 16 |
| LDH1_LAC<br>AC   | ldh1        | 0 | 0 | 0 | 47 | 63 | 55 |
| RS5_LACA<br>C    | rpsE        | 0 | 0 | 0 | 14 | 15 | 11 |
| Q5FKH2_L<br>ACAC | LBA0<br>950 | 0 | 0 | 0 | 3  | 4  | 4  |
| RS16_LAC<br>AC   | rpsP        | 0 | 0 | 0 | 9  | 9  | 12 |
| RS11_LAC<br>AC   | rpsK        | 0 | 0 | 0 | 13 | 17 | 13 |
| RL29_LAC<br>AC   | rpmC        | 0 | 0 | 0 | 11 | 8  | 11 |
| Q5FMF0_L<br>ACAC | LBA0<br>229 | 0 | 0 | 0 | 8  | 8  | 6  |
| Q5FI30_LA<br>CAC | LBA1<br>842 | 0 | 0 | 0 | 13 | 11 | 9  |
| Q5FKH9_L<br>ACAC | LBA0<br>942 | 0 | 0 | 0 | 23 | 19 | 17 |
| Q5FMS3_L<br>ACAC | LBA0<br>100 | 0 | 0 | 0 | 9  | 7  | 9  |
| Q5FMF6_L<br>ACAC | cdpA        | 0 | 0 | 0 | 16 | 12 | 14 |
| Q5FIU1_LA<br>CAC | LBA1<br>566 | 0 | 0 | 0 | 9  | 7  | 7  |
| Q5FMT9_L<br>ACAC | htrA        | 0 | 0 | 0 | 13 | 10 | 9  |
| Q5FK98_L<br>ACAC | LBA1<br>027 | 0 | 0 | 0 | 5  | 4  | 4  |
| Q5FMH5_L<br>ACAC | pepE        | 0 | 0 | 0 | 16 | 12 | 12 |
| Q5FM46_L<br>ACAC | LBA0<br>336 | 0 | 0 | 0 | 8  | 11 | 11 |
| FMT_LAC<br>AC    | fnt         | 0 | 0 | 0 | 2  | 3  | 3  |
| Q5FMM4_L<br>ACAC | uspA        | 0 | 0 | 0 | 7  | 8  | 6  |

|                  |             |   |   |   |    |    |    |
|------------------|-------------|---|---|---|----|----|----|
| Q5FMY1_L<br>ACAC | LBA0<br>038 | 0 | 0 | 0 | 4  | 3  | 4  |
| Q5FJK1_LA<br>CAC | LBA1<br>293 | 0 | 0 | 0 | 5  | 6  | 8  |
| KITH_LAC<br>AC   | tdk         | 0 | 0 | 0 | 4  | 5  | 4  |
| Y1592_LAC<br>AC  | LBA1<br>592 | 0 | 0 | 0 | 23 | 17 | 24 |
| Q5FIY4_LA<br>CAC | LBA1<br>521 | 0 | 0 | 0 | 5  | 6  | 4  |
| RS21_LAC<br>AC   | rpsU        | 0 | 0 | 0 | 3  | 4  | 5  |
| Q5FK97_L<br>ACAC | LBA1<br>029 | 0 | 0 | 0 | 3  | 3  | 4  |
| ATPA_LAC<br>AC   | atpA        | 0 | 0 | 0 | 40 | 35 | 28 |
| Q5FMI0_L<br>ACAC | LBA0<br>199 | 0 | 0 | 0 | 22 | 26 | 18 |
| MURE_LA<br>CAC   | murE        | 0 | 0 | 0 | 19 | 22 | 16 |
| Q5FML4_L<br>ACAC | LBA0<br>159 | 0 | 0 | 0 | 9  | 8  | 6  |
| Q5FHV8_L<br>ACAC | LBA1<br>919 | 0 | 0 | 0 | 3  | 4  | 3  |
| Q5FK83_L<br>ACAC | LBA1<br>045 | 0 | 0 | 0 | 10 | 8  | 8  |
| Q5FJK0_LA<br>CAC | LBA1<br>294 | 0 | 0 | 0 | 13 | 9  | 10 |
| Q5FIM0_L<br>ACAC | LBA1<br>642 | 0 | 0 | 0 | 7  | 5  | 5  |
| PYRG_LAC<br>AC   | pyrG        | 0 | 0 | 0 | 30 | 39 | 28 |
| Q5FK81_L<br>ACAC | LBA1<br>047 | 0 | 0 | 0 | 4  | 4  | 3  |
| Y418_LAC<br>AC   | LBA0<br>418 | 0 | 0 | 0 | 12 | 10 | 14 |
| Q5FLV4_L<br>ACAC | LBA0<br>429 | 0 | 0 | 0 | 13 | 15 | 18 |
| Q5FJQ3_LA<br>CAC | LBA1<br>238 | 0 | 0 | 0 | 3  | 2  | 3  |
| RL4_LACA<br>C    | rplD        | 0 | 0 | 0 | 22 | 17 | 15 |
| Q5FIS0_LA<br>CAC | prtM        | 0 | 0 | 0 | 20 | 14 | 15 |
| SYA_LACA<br>C    | alaS        | 0 | 0 | 0 | 14 | 20 | 15 |

|                  |             |   |   |   |     |     |     |
|------------------|-------------|---|---|---|-----|-----|-----|
| Q5FKD6_L<br>ACAC | LBA0<br>987 | 0 | 0 | 0 | 37  | 40  | 53  |
| Q5FIL6_LA<br>CAC | LBA1<br>646 | 0 | 0 | 0 | 6   | 6   | 4   |
| RS17_LAC<br>AC   | rpsQ        | 0 | 0 | 0 | 15  | 11  | 16  |
| IF1_LACA<br>C    | infA        | 0 | 0 | 0 | 5   | 4   | 5   |
| TSAD_LAC<br>AC   | tsaD        | 0 | 0 | 0 | 8   | 6   | 5   |
| Q5FKD0_L<br>ACAC | pepD        | 0 | 0 | 0 | 17  | 17  | 12  |
| Q5FI38_LA<br>CAC | LBA1<br>834 | 0 | 0 | 0 | 7   | 10  | 8   |
| ENO_LAC<br>AC    | eno         | 0 | 0 | 0 | 399 | 560 | 602 |
| Q5FMI4_L<br>ACAC | pepG        | 0 | 0 | 0 | 5   | 7   | 6   |
| TYSY_LAC<br>AC   | thyA        | 0 | 0 | 0 | 4   | 4   | 3   |
| ATPD_LAC<br>AC   | atpH        | 0 | 0 | 0 | 5   | 5   | 4   |
| Q5FKX5_L<br>ACAC | LBA0<br>783 | 0 | 0 | 0 | 16  | 19  | 12  |
| Q5FLM1_L<br>ACAC | nadE        | 0 | 0 | 0 | 8   | 5   | 6   |
| RL30_LAC<br>AC   | rpmD        | 0 | 0 | 0 | 8   | 7   | 10  |
| CAPP_LAC<br>AC   | ppc         | 0 | 0 | 0 | 19  | 20  | 13  |
| Q5FM15_L<br>ACAC | LBA0<br>367 | 0 | 0 | 0 | 5   | 5   | 4   |
| GPDA_LAC<br>AC   | gpsA        | 0 | 0 | 0 | 12  | 14  | 9   |
| APT_LACA<br>C    | apt         | 0 | 0 | 0 | 10  | 6   | 8   |
| Q5FJI4_LA<br>CAC | LBA1<br>311 | 0 | 0 | 0 | 10  | 7   | 7   |
| RS4_LACA<br>C    | rpsD        | 0 | 0 | 0 | 24  | 19  | 30  |
| Q5FI56_LA<br>CAC | LBA1<br>816 | 0 | 0 | 0 | 7   | 4   | 6   |
| Q5FMF5_L<br>ACAC | prsA        | 0 | 0 | 0 | 21  | 16  | 13  |
| Q5FIH7_LA<br>CAC | LBA1<br>685 | 0 | 0 | 0 | 6   | 9   | 7   |

|                  |             |   |   |   |    |    |    |
|------------------|-------------|---|---|---|----|----|----|
| RPOZ_LAC<br>AC   | rpoZ        | 0 | 0 | 0 | 5  | 4  | 3  |
| Q5FKT2_L<br>ACAC | def         | 0 | 0 | 0 | 5  | 4  | 3  |
| RL3_LACA<br>C    | rplC        | 0 | 0 | 0 | 19 | 17 | 27 |
| Q5FJT4_LA<br>CAC | LBA1<br>204 | 0 | 0 | 0 | 4  | 5  | 6  |
| Q5FJQ6_LA<br>CAC | LBA1<br>235 | 0 | 0 | 0 | 9  | 6  | 9  |
| Q5FM24_L<br>ACAC | nusG        | 0 | 0 | 0 | 8  | 5  | 8  |
| RS20_LAC<br>AC   | rpsT        | 0 | 0 | 0 | 7  | 7  | 10 |
| Q5FM32_L<br>ACAC | LBA0<br>350 | 0 | 0 | 0 | 5  | 6  | 4  |
| Q5FMN5_L<br>ACAC | LBA0<br>138 | 0 | 0 | 0 | 3  | 3  | 2  |
| Q5FKK1_L<br>ACAC | citE        | 0 | 0 | 0 | 19 | 13 | 13 |
| Q5FII2_LA<br>CAC | LBA1<br>680 | 0 | 0 | 0 | 3  | 5  | 3  |
| Q5FLS5_L<br>ACAC | glmS        | 0 | 0 | 0 | 14 | 8  | 11 |
| Q5FJT9_LA<br>CAC | glyQ        | 0 | 0 | 0 | 5  | 7  | 4  |
| Q5FIB9_LA<br>CAC | LBA1<br>744 | 0 | 0 | 0 | 4  | 3  | 4  |
| RL14_LAC<br>AC   | rplN        | 0 | 0 | 0 | 6  | 5  | 4  |
| HSLU_LAC<br>AC   | hslU        | 0 | 0 | 0 | 8  | 9  | 5  |
| Q5FL96_LA<br>CAC | LBA0<br>649 | 0 | 0 | 0 | 15 | 9  | 12 |
| Q5FML7_L<br>ACAC | LBA0<br>156 | 0 | 0 | 0 | 11 | 7  | 7  |
| FTHS1_LA<br>CAC  | fhs1        | 0 | 0 | 0 | 10 | 7  | 6  |
| Q5FLV2_L<br>ACAC | ccpA        | 0 | 0 | 0 | 12 | 13 | 7  |
| Q5FLW1_L<br>ACAC | LBA0<br>422 | 0 | 0 | 0 | 36 | 22 | 23 |
| Q5FL16_LA<br>CAC | LBA0<br>740 | 0 | 0 | 0 | 2  | 1  | 1  |
| RF1_LACA<br>C    | prfA        | 0 | 0 | 0 | 10 | 6  | 6  |

|                  |             |   |   |   |    |    |    |
|------------------|-------------|---|---|---|----|----|----|
| RS18_LAC<br>AC   | rpsR        | 0 | 0 | 0 | 6  | 4  | 7  |
| Q5FMB1_L<br>ACAC | LBA0<br>270 | 0 | 0 | 0 | 4  | 2  | 3  |
| Q5FIU0_LA<br>CAC | LBA1<br>567 | 0 | 0 | 0 | 9  | 5  | 6  |
| Q5FL92_LA<br>CAC | pthA        | 0 | 0 | 0 | 7  | 4  | 7  |
| Q5FMM9_L<br>ACAC | LBA0<br>144 | 0 | 0 | 0 | 3  | 2  | 4  |
| Q5FI44_LA<br>CAC | parB        | 0 | 0 | 0 | 8  | 4  | 7  |
| Q5FMA3_L<br>ACAC | ftsH        | 0 | 0 | 0 | 6  | 5  | 3  |
| Q5FIW7_L<br>ACAC | infC        | 0 | 0 | 0 | 6  | 3  | 4  |
| SYD_LACA<br>C    | aspS        | 0 | 0 | 0 | 2  | 3  | 4  |
| Q5FK32_L<br>ACAC | LBA1<br>098 | 0 | 0 | 0 | 3  | 4  | 2  |
| OBG_LAC<br>AC    | obg         | 0 | 0 | 0 | 2  | 2  | 1  |
| Q5FMK8_L<br>ACAC | pepO        | 0 | 0 | 0 | 2  | 3  | 2  |
| Q5FMK6_L<br>ACAC | LBA0<br>167 | 0 | 0 | 0 | 7  | 4  | 9  |
| Q5FKP7_L<br>ACAC | LBA0<br>868 | 0 | 0 | 0 | 3  | 5  | 7  |
| Q5FIK4_LA<br>CAC | LBA1<br>658 | 0 | 0 | 0 | 5  | 5  | 3  |
| Q5FN01_L<br>ACAC | LBA0<br>016 | 0 | 0 | 0 | 8  | 5  | 4  |
| CLPP_LAC<br>AC   | clpP        | 0 | 0 | 0 | 10 | 12 | 6  |
| RS13_LAC<br>AC   | rpsM        | 0 | 0 | 0 | 10 | 6  | 13 |
| Q5FMG6_L<br>ACAC | metG        | 0 | 0 | 0 | 15 | 16 | 8  |
| Q5FMJ9_L<br>ACAC | LBA0<br>176 | 0 | 0 | 0 | 3  | 3  | 2  |
| Q5FLS2_L<br>ACAC | mutT        | 0 | 0 | 0 | 5  | 3  | 4  |
| RL7_LACA<br>C    | rpIL        | 0 | 0 | 0 | 76 | 35 | 73 |
| Q5FHY5_L<br>ACAC | purB        | 0 | 0 | 0 | 7  | 13 | 16 |

|           |      |   |   |   |    |    |    |
|-----------|------|---|---|---|----|----|----|
| Q5FIX9_LA | LBA1 | 0 | 0 | 0 | 3  | 2  | 2  |
| CAC       | 526  |   |   |   |    |    |    |
| Q5FLT3_L  | manL | 0 | 0 | 0 | 5  | 2  | 5  |
| ACAC      |      |   |   |   |    |    |    |
| DEOC_LAC  | deoC | 0 | 0 | 0 | 3  | 4  | 2  |
| AC        |      |   |   |   |    |    |    |
| Q5FIS6_LA | LBA1 | 0 | 0 | 0 | 7  | 7  | 13 |
| CAC       | 581  |   |   |   |    |    |    |
| Q5FJN3_LA | nusA | 0 | 0 | 0 | 4  | 2  | 5  |
| CAC       |      |   |   |   |    |    |    |
| Q5FHU8_L  | LBA1 | 0 | 0 | 0 | 1  | 3  | 3  |
| ACAC      | 929  |   |   |   |    |    |    |
| Q5FJK4_LA | ffh  | 0 | 0 | 0 | 11 | 5  | 7  |
| CAC       |      |   |   |   |    |    |    |
| RS19_LAC  | rpsS | 0 | 0 | 0 | 21 | 12 | 29 |
| AC        |      |   |   |   |    |    |    |
| Q5FIT9_LA | LBA1 | 0 | 0 | 0 | 2  | 2  | 4  |
| CAC       | 568  |   |   |   |    |    |    |
| Q5FIL7_LA | LBA1 | 0 | 0 | 0 | 7  | 3  | 4  |
| CAC       | 645  |   |   |   |    |    |    |
| Q5FLM2_L  | nadC | 0 | 0 | 0 | 1  | 2  | 1  |
| ACAC      |      |   |   |   |    |    |    |
| Q5FL62_LA | LBA0 | 0 | 0 | 0 | 4  | 8  | 4  |
| CAC       | 687  |   |   |   |    |    |    |
| Q5FL69_LA | trxB | 0 | 0 | 0 | 2  | 5  | 3  |
| CAC       |      |   |   |   |    |    |    |
| Q5FN02_L  | LBA0 | 0 | 0 | 0 | 3  | 6  | 3  |
| ACAC      | 015  |   |   |   |    |    |    |
| Q5FLW7_L  | LBA0 | 0 | 0 | 0 | 2  | 4  | 2  |
| ACAC      | 416  |   |   |   |    |    |    |
| Q5FI60_LA | LBA1 | 0 | 0 | 0 | 5  | 4  | 2  |
| CAC       | 812  |   |   |   |    |    |    |
| ACPS_LAC  | acpS | 0 | 0 | 0 | 3  | 3  | 1  |
| AC        |      |   |   |   |    |    |    |
| Q5FJT5_LA | phoH | 0 | 0 | 0 | 8  | 5  | 3  |
| CAC       |      |   |   |   |    |    |    |
| Q5FIQ0_LA | LBA1 | 0 | 0 | 0 | 3  | 3  | 6  |
| CAC       | 609  |   |   |   |    |    |    |
| DER_LACA  | der  | 0 | 0 | 0 | 2  | 1  | 1  |
| C         |      |   |   |   |    |    |    |
| SYV_LACA  | valS | 0 | 0 | 0 | 4  | 4  | 2  |
| C         |      |   |   |   |    |    |    |
| Q5FHR1_L  | LBA1 | 0 | 0 | 0 | 2  | 1  | 3  |
| ACAC      | 970  |   |   |   |    |    |    |
| Q5FIM9_L  | ssdh | 0 | 0 | 0 | 3  | 1  | 2  |
| ACAC      |      |   |   |   |    |    |    |

|                  |             |   |   |   |   |   |   |
|------------------|-------------|---|---|---|---|---|---|
| Q5FJG4_LA<br>CAC | nusB        | 0 | 0 | 0 | 2 | 2 | 4 |
| Q5FLV5_L<br>ACAC | LBA0<br>428 | 0 | 0 | 0 | 4 | 2 | 3 |
| Q5FJN4_LA<br>CAC | LBA1<br>258 | 0 | 0 | 0 | 3 | 1 | 4 |
| Q5FJI9_LA<br>CAC | oppD        | 0 | 0 | 0 | 5 | 5 | 2 |
| Q5FKB8_L<br>ACAC | LBA1<br>006 | 0 | 0 | 0 | 3 | 1 | 2 |
| Q5FLD2_L<br>ACAC | hprT        | 0 | 0 | 0 | 2 | 1 | 3 |
| Q5FMH0_L<br>ACAC | LBA0<br>209 | 0 | 0 | 0 | 8 | 6 | 2 |
| Q5FIC4_LA<br>CAC | hfIX        | 0 | 0 | 0 | 2 | 4 | 1 |
| Q5FLY8_L<br>ACAC | frc         | 0 | 0 | 0 | 3 | 8 | 3 |
| Q5FIU3_LA<br>CAC | LBA1<br>564 | 0 | 0 | 0 | 8 | 3 | 3 |
| RL28_LAC<br>AC   | rpmB        | 0 | 0 | 0 | 2 | 1 | 5 |
| Q5FI72_LA<br>CAC | LBA1<br>798 | 0 | 0 | 0 | 4 | 4 | 0 |
| Q5FLG5_L<br>ACAC | glnQ        | 0 | 0 | 0 | 2 | 2 | 0 |
| Q5FI35_LA<br>CAC | LBA1<br>837 | 0 | 0 | 0 | 1 | 1 | 0 |
| Q5FKV0_L<br>ACAC | ftsA        | 0 | 0 | 0 | 2 | 0 | 2 |
| RL32_LAC<br>AC   | rpmF        | 0 | 0 | 0 | 4 | 5 | 0 |
| Q5FKM8_L<br>ACAC | LBA0<br>887 | 0 | 0 | 0 | 4 | 3 | 0 |
| CITD_LAC<br>AC   | citD        | 0 | 0 | 0 | 3 | 0 | 4 |
| Q5FMR5_L<br>ACAC | LBA0<br>108 | 0 | 0 | 0 | 3 | 3 | 0 |
| Q5FHV4_L<br>ACAC | dltD        | 0 | 0 | 0 | 3 | 4 | 0 |
| Q5FJL9_LA<br>CAC | pepO        | 0 | 0 | 0 | 5 | 4 | 0 |
| Q5FIY0_LA<br>CAC | lisR        | 0 | 0 | 0 | 8 | 6 | 0 |
| Q5FKK9_L<br>ACAC | LBA0<br>908 | 0 | 0 | 0 | 1 | 2 | 0 |

|                  |             |   |   |   |   |   |   |
|------------------|-------------|---|---|---|---|---|---|
| Q5FL44_LA<br>CAC | LBA0<br>705 | 0 | 0 | 0 | 2 | 0 | 2 |
| Q5FKD9_L<br>ACAC | hslV        | 0 | 0 | 0 | 0 | 4 | 3 |
| Q5FKX8_L<br>ACAC | mreB        | 0 | 0 | 0 | 3 | 0 | 4 |
| Q5FIY3_LA<br>CAC | acyP        | 0 | 0 | 0 | 4 | 0 | 3 |
| SYFB_LAC<br>AC   | pheT        | 0 | 0 | 0 | 0 | 2 | 1 |
| Q5FME4_L<br>ACAC | LBA0<br>235 | 0 | 0 | 0 | 5 | 3 | 0 |
| Q5FK76_L<br>ACAC | LBA1<br>052 | 0 | 0 | 0 | 3 | 0 | 2 |
| Q5FJC6_LA<br>CAC | pepX        | 0 | 0 | 0 | 2 | 0 | 4 |
| Q5FM26_L<br>ACAC | LBA0<br>356 | 0 | 0 | 0 | 2 | 0 | 3 |
| Q5FKY9_L<br>ACAC | hemK        | 0 | 0 | 0 | 5 | 0 | 3 |
| Q5FN10_L<br>ACAC | gyrA        | 0 | 0 | 0 | 0 | 3 | 1 |
| Q5FIQ2_LA<br>CAC | LBA1<br>607 | 0 | 0 | 0 | 3 | 0 | 1 |
| Q5FI73_LA<br>CAC | LBA1<br>797 | 0 | 0 | 0 | 4 | 0 | 2 |
| Q5FI94_LA<br>CAC | psaA        | 0 | 0 | 0 | 3 | 1 | 0 |
| DNAJ_LAC<br>AC   | dnaJ        | 0 | 0 | 0 | 1 | 4 | 0 |
| Q5FLV3_L<br>ACAC | LBA0<br>430 | 0 | 0 | 0 | 5 | 0 | 1 |
| Q5FIX7_LA<br>CAC | rsfS        | 0 | 0 | 0 | 3 | 0 | 0 |
| Q5FHV2_L<br>ACAC | dltB        | 0 | 0 | 0 | 0 | 3 | 0 |
| RSMA_LA<br>CAC   | rsmA        | 0 | 0 | 0 | 0 | 2 | 0 |
| RL35_LAC<br>AC   | rpmI        | 0 | 0 | 0 | 1 | 0 | 0 |
| Q5FJV0_LA<br>CAC | LBA1<br>188 | 0 | 0 | 0 | 0 | 0 | 3 |
| Q5FML5_L<br>ACAC | asnH        | 0 | 0 | 0 | 1 | 0 | 0 |
| Q5FLF8_L<br>ACAC | LBA0<br>586 | 0 | 0 | 0 | 3 | 0 | 0 |



|                  |             |   |   |   |   |   |   |
|------------------|-------------|---|---|---|---|---|---|
| Q5FLA8_L<br>ACAC | LBA0<br>637 | 0 | 0 | 0 | 0 | 0 | 2 |
| Q5FIJ0_LA<br>CAC | oppF        | 0 | 0 | 0 | 0 | 3 | 0 |
| RPIA_LAC<br>AC   | rpiA        | 0 | 0 | 0 | 0 | 3 | 0 |
| Q5FKI1_LA<br>CAC | LBA0<br>940 | 0 | 0 | 0 | 1 | 0 | 0 |
| EX7S_LAC<br>AC   | xseB        | 0 | 0 | 0 | 0 | 0 | 1 |
| Q5FLI8_LA<br>CAC | LBA0<br>555 | 0 | 0 | 0 | 3 | 0 | 0 |
| Q5FIW6_L<br>ACAC | LBA1<br>539 | 0 | 0 | 0 | 0 | 1 | 0 |
| Q5FMB5_L<br>ACAC | murF        | 0 | 0 | 0 | 0 | 1 | 0 |
| Q5FLT5_L<br>ACAC | rnr         | 0 | 0 | 0 | 1 | 0 | 0 |
| Q5FMW1_L<br>ACAC | pbpX        | 0 | 0 | 0 | 0 | 0 | 3 |
| MURG_LA<br>CAC   | murG        | 0 | 0 | 0 | 0 | 0 | 1 |
| Q5FKI7_LA<br>CAC | relA        | 0 | 0 | 0 | 0 | 2 | 0 |
| Q5FHR5_L<br>ACAC | copA        | 0 | 0 | 0 | 0 | 0 | 1 |
| Q5FI45_LA<br>CAC | parA        | 0 | 0 | 0 | 0 | 1 | 0 |
| Q5FIN0_LA<br>CAC | LBA1<br>631 | 0 | 0 | 0 | 0 | 2 | 0 |
| Q5FKQ0_L<br>ACAC | LBA0<br>865 | 0 | 0 | 0 | 0 | 1 | 0 |
| Q5FKL0_L<br>ACAC | fumC        | 0 | 0 | 0 | 1 | 0 | 0 |
| Q5FK04_L<br>ACAC | LBA1<br>126 | 0 | 0 | 0 | 0 | 0 | 1 |
| KGUA_LA<br>CAC   | gmk         | 0 | 0 | 0 | 0 | 0 | 2 |
| Q5FLM4_L<br>ACAC | tagA        | 0 | 0 | 0 | 0 | 1 | 0 |
| Q5FKZ2_L<br>ACAC | LBA0<br>765 | 0 | 0 | 0 | 0 | 1 | 0 |
| Q5FJR9_LA<br>CAC | LBA1<br>220 | 0 | 0 | 0 | 0 | 0 | 3 |
| Q5FKY8_L<br>ACAC | LBA0<br>769 | 0 | 0 | 0 | 4 | 0 | 0 |

|           |      |   |   |   |   |   |   |
|-----------|------|---|---|---|---|---|---|
| Q5FIU2_LA | LBA1 | 0 | 0 | 0 | 0 | 0 | 2 |
| CAC       | 565  |   |   |   |   |   |   |
| Q5FJ35_LA | galE | 0 | 0 | 0 | 0 | 0 | 2 |
| CAC       |      |   |   |   |   |   |   |
| Q5FJU2_LA | rpoD | 0 | 0 | 0 | 0 | 0 | 2 |
| CAC       |      |   |   |   |   |   |   |
| Q5FK51_L  | bshB | 0 | 0 | 0 | 3 | 0 | 0 |
| ACAC      |      |   |   |   |   |   |   |
| RECA_LAC  | recA | 0 | 0 | 0 | 0 | 0 | 2 |
| AC        |      |   |   |   |   |   |   |
| Q5FKK6_L  | LBA0 | 0 | 0 | 0 | 0 | 0 | 2 |
| ACAC      | 911  |   |   |   |   |   |   |
| DGK2_LAC  | LBA1 | 0 | 0 | 0 | 2 | 0 | 0 |
| AC        | 950  |   |   |   |   |   |   |
