# Supplementary material for: Isolation and characterization of Lactobacillus-derived membrane vesicles
Source: PubMed Central journal article supplement (PMC6351534; doi:10.1038/s41598-018-37120-6), 2019-01-29
Supplement: 41598_2018_37120_MOESM3_ESM.pdf [file 41598_2018_37120_MOESM3_ESM.pdf]

**Table S2.** List of proteins identified in MVs and pellet *Lactobacillus casei*.

| Uniprot ID       | Locus ID      | MV sample 1 | MV sample 2 | MV sample 3 | Pellet sample 1 | Pellet sample 2 | Pellet sample 3 |
|------------------|---------------|-------------|-------------|-------------|-----------------|-----------------|-----------------|
| Q03AK7_L<br>ACP3 | LSEI_0<br>967 | 1109        | 619         | 840         | 538             | 562             | 586             |
| Q03CD1_L<br>ACP3 | LSEI_0<br>281 | 974         | 640         | 601         | 8               | 9               | 12              |
| Q038J0_LA<br>CP3 | LSEI_1<br>608 | 636         | 561         | 434         | 82              | 95              | 97              |
| Q036Q4_L<br>ACP3 | LSEI_2<br>065 | 536         | 519         | 402         | 94              | 55              | 124             |
| Q03D36_L<br>ACP3 | LSEI_0<br>020 | 266         | 222         | 183         | 32              | 41              | 38              |
| Q03CH3_L<br>ACP3 | LSEI_0<br>236 | 230         | 122         | 111         | 4               | 2               | 6               |
| Q03AI8_LA<br>CP3 | LSEI_0<br>988 | 185         | 159         | 115         | 13              | 12              | 16              |
| S6CK93_L<br>ACCA | LBCZ_<br>2692 | 216         | 95          | 76          | 0               | 0               | 0               |
| S6C5N2_L<br>ACCA | LBCZ_<br>0371 | 167         | 138         | 72          | 0               | 0               | 0               |
| Q03CC3_L<br>ACP3 | LSEI_0<br>289 | 86          | 116         | 72          | 5               | 3               | 7               |
| Q038X2_L<br>ACP3 | LSEI_1<br>472 | 131         | 16          | 96          | 13              | 6               | 7               |
| Q036T8_L<br>ACP3 | LSEI_2<br>029 | 81          | 69          | 56          | 7               | 8               | 5               |
| PAGL2_LA<br>CP3  | LSEI_2<br>684 | 72          | 58          | 64          | 13              | 12              | 4               |
| Q03CH3_L<br>ACP3 | LSEI_0<br>236 | 54          | 37          | 40          | 0               | 0               | 0               |
| Q03BH5_L<br>ACP3 | LSEI_0<br>603 | 81          | 11          | 24          | 0               | 0               | 0               |
| TPIS_LACP<br>3   | LSEI_0<br>969 | 59          | 5           | 52          | 105             | 95              | 171             |
| S6C5N2_L<br>ACCA | LBCZ_<br>0371 | 23          | 53          | 24          | 0               | 0               | 0               |
| ATPG_LAC<br>P3   | LSEI_1<br>165 | 36          | 16          | 32          | 3               | 0               | 1               |
| Q035T2_L<br>ACP3 | LSEI_2<br>296 | 54          | 5           | 4           | 3               | 2               | 0               |
| IF2_LACP3        | LSEI_1<br>573 | 27          | 11          | 20          | 0               | 4               | 1               |
| Q038R1_L<br>ACP3 | LSEI_1<br>536 | 36          | 0           | 16          | 0               | 0               | 0               |

|                  |               |    |    |    |     |     |     |
|------------------|---------------|----|----|----|-----|-----|-----|
| Q039D0_L<br>ACP  | LSEI_1<br>414 | 14 | 5  | 20 | 28  | 17  | 29  |
| F16PC_LA<br>CP3  | LSEI_2<br>045 | 18 | 11 | 8  | 0   | 0   | 0   |
| Q034Q4_L<br>ACP3 | LSEI_2<br>597 | 0  | 21 | 16 | 123 | 114 | 142 |
| GATA_LA<br>CP3   | LSEI_1<br>058 | 32 | 0  | 4  | 0   | 1   | 0   |
| GATB_LA<br>CP3   | LSEI_1<br>059 | 14 | 0  | 20 | 0   | 1   | 0   |
| DER_LACP<br>3    | LSEI_1<br>380 | 9  | 0  | 24 | 0   | 0   | 0   |
| GLGA_LA<br>CP3   | LSEI_2<br>037 | 0  | 32 | 0  | 0   | 0   | 1   |
| CH10_LAC<br>P3   | LSEI_2<br>239 | 14 | 5  | 12 | 91  | 129 | 100 |
| Q03BV1_L<br>ACP3 | LSEI_0<br>470 | 18 | 0  | 12 | 1   | 3   | 3   |
| CCA_LACP<br>3    | LSEI_1<br>384 | 9  | 21 | 0  | 0   | 0   | 0   |
| RL7_LACP<br>3    | LSEI_2<br>272 | 5  | 21 | 4  | 113 | 104 | 109 |
| S6C674_LA<br>CCA | LBCZ_<br>0621 | 9  | 16 | 4  | 0   | 4   | 2   |
| Q039G3_L<br>ACP3 | LSEI_1<br>381 | 18 | 0  | 8  | 126 | 227 | 138 |
| DPO3_LAC<br>P3   | LSEI_1<br>578 | 9  | 16 | 0  | 0   | 0   | 0   |
| CINA_LAC<br>P3   | LSEI_0<br>922 | 5  | 16 | 4  | 0   | 0   | 0   |
| Q037M8_L<br>ACP3 | LSEI_1<br>829 | 14 | 5  | 4  | 0   | 0   | 0   |
| Q03CR3_L<br>ACP3 | LSEI_0<br>145 | 18 | 0  | 4  | 6   | 17  | 23  |
| ATPA_LAC<br>P3   | LSEI_1<br>164 | 9  | 5  | 8  | 17  | 16  | 22  |
| MUTL_LA<br>CP3   | LSEI_2<br>234 | 9  | 11 | 0  | 0   | 0   | 0   |
| EFTU_LAC<br>P3   | LSEI_1<br>332 | 0  | 16 | 0  | 477 | 469 | 380 |
| DEF_LACP<br>3    | LSEI_1<br>303 | 0  | 16 | 0  | 0   | 0   | 0   |
| GUAA_LA<br>CP3   | LSEI_1<br>979 | 0  | 11 | 4  | 0   | 4   | 2   |
| Q034U9_L<br>ACP3 | LSEI_2<br>550 | 14 | 0  | 0  | 0   | 0   | 0   |

|                  |               |   |    |   |     |     |     |
|------------------|---------------|---|----|---|-----|-----|-----|
| G6PI_LAC<br>P3   | LSEI_1<br>126 | 5 | 5  | 4 | 99  | 72  | 53  |
| PURL_LAC<br>P3   | LSEI_1<br>751 | 9 | 0  | 4 | 0   | 0   | 0   |
| FMT_LACP<br>3    | LSEI_1<br>625 | 9 | 0  | 4 | 0   | 0   | 0   |
| ERA_LACP<br>3    | LSEI_1<br>515 | 9 | 0  | 4 | 0   | 1   | 0   |
| FTHS_LAC<br>P3   | LSEI_1<br>460 | 0 | 11 | 0 | 0   | 0   | 0   |
| PYRDA_L<br>ACP3  | LSEI_1<br>451 | 0 | 11 | 0 | 0   | 0   | 0   |
| FOLD_LAC<br>P3   | LSEI_1<br>639 | 0 | 11 | 0 | 0   | 0   | 0   |
| CH60_LAC<br>P3   | LSEI_2<br>238 | 5 | 5  | 0 | 379 | 420 | 353 |
| NADE_LA<br>CP3   | LSEI_1<br>804 | 9 | 0  | 0 | 0   | 1   | 1   |
| GLGC_LA<br>CP3   | LSEI_2<br>039 | 9 | 0  | 0 | 0   | 0   | 0   |
| Q035V8_L<br>ACP3 | LSEI_2<br>270 | 9 | 0  | 0 | 0   | 0   | 0   |
| ENO_LACP<br>3    | LSEI_0<br>970 | 5 | 0  | 0 | 452 | 350 | 303 |
| DNAK_LA<br>CP3   | LSEI_1<br>565 | 5 | 0  | 0 | 116 | 185 | 176 |
| ATPB_LAC<br>P3   | LSEI_1<br>166 | 5 | 0  | 0 | 30  | 22  | 24  |
| Q03CI4_LA<br>CP3 | LSEI_0<br>225 | 5 | 0  | 0 | 87  | 27  | 36  |
| RS13_LAC<br>P3   | LSEI_2<br>479 | 5 | 0  | 0 | 0   | 22  | 4   |
| DDL_LACP<br>3    | LSEI_0<br>143 | 5 | 0  | 0 | 0   | 4   | 2   |
| EFTS_LAC<br>P3   | LSEI_1<br>585 | 0 | 5  | 0 | 3   | 10  | 9   |
| EFG_LACP<br>3    | LSEI_2<br>508 | 0 | 5  | 0 | 2   | 12  | 6   |
| Q039H9_L<br>ACP3 | LSEI_1<br>365 | 0 | 0  | 0 | 308 | 245 | 283 |
| PGK_LACP<br>3    | LSEI_0<br>968 | 0 | 0  | 0 | 279 | 166 | 239 |
| Q036R9_L<br>ACP3 | LSEI_2<br>048 | 0 | 0  | 0 | 230 | 248 | 236 |
| CH60_LAC<br>P3   | LSEI_2<br>238 | 0 | 0  | 0 | 209 | 232 | 216 |

|                  |               |   |   |   |     |     |     |
|------------------|---------------|---|---|---|-----|-----|-----|
| Q033V8_L<br>ACP3 | LSEI_2<br>800 | 0 | 0 | 0 | 135 | 114 | 241 |
| Q037U0_L<br>ACP3 | LSEI_1<br>760 | 0 | 0 | 0 | 140 | 221 | 146 |
| Q03B97_L<br>ACP3 | LSEI_0<br>685 | 0 | 0 | 0 | 177 | 120 | 118 |
| Q034V0_L<br>ACP3 | LSEI_2<br>549 | 0 | 0 | 0 | 125 | 110 | 111 |
| Q039G5_L<br>ACP3 | LSEI_1<br>379 | 0 | 0 | 0 | 61  | 127 | 141 |
| Q035B9_L<br>ACP3 | LSEI_2<br>467 | 0 | 0 | 0 | 114 | 63  | 129 |
| TIG_LACP<br>3    | LSEI_1<br>338 | 0 | 0 | 0 | 84  | 95  | 61  |
| Q03B95_L<br>ACP3 | LSEI_0<br>687 | 0 | 0 | 0 | 99  | 73  | 75  |
| Q036I8_LA<br>CP3 | LSEI_2<br>134 | 0 | 0 | 0 | 70  | 72  | 78  |
| RL5_LACP<br>3    | LSEI_2<br>491 | 0 | 0 | 0 | 62  | 49  | 68  |
| Q03A86_L<br>ACP3 | LSEI_1<br>093 | 0 | 0 | 0 | 56  | 50  | 69  |
| Q036K4_L<br>ACP3 | LSEI_2<br>118 | 0 | 0 | 0 | 55  | 54  | 66  |
| RL11_LAC<br>P3   | LSEI_2<br>280 | 0 | 0 | 0 | 59  | 33  | 48  |
| RS2_LACP<br>3    | LSEI_1<br>586 | 0 | 0 | 0 | 53  | 53  | 58  |
| RL18_LAC<br>P3   | LSEI_2<br>487 | 0 | 0 | 0 | 52  | 55  | 61  |
| Q037U1_L<br>ACP3 | LSEI_1<br>759 | 0 | 0 | 0 | 46  | 50  | 42  |
| RL10_LAC<br>P3   | LSEI_2<br>273 | 0 | 0 | 0 | 51  | 46  | 38  |
| RL2_LACP<br>3    | LSEI_2<br>500 | 0 | 0 | 0 | 35  | 52  | 43  |
| ENO_LACP<br>3    | LSEI_0<br>970 | 0 | 0 | 0 | 38  | 46  | 51  |
| Q036B1_L<br>ACP3 | LSEI_2<br>214 | 0 | 0 | 0 | 36  | 41  | 49  |
| Q03AN1_L<br>ACP3 | LSEI_0<br>942 | 0 | 0 | 0 | 35  | 38  | 35  |
| RS8_LACP<br>3    | LSEI_2<br>489 | 0 | 0 | 0 | 28  | 43  | 26  |
| RS7_LACP<br>3    | LSEI_2<br>509 | 0 | 0 | 0 | 28  | 21  | 40  |

|                  |               |   |   |   |    |    |    |
|------------------|---------------|---|---|---|----|----|----|
| Q03BY4_L<br>ACP3 | LSEI_0<br>432 | 0 | 0 | 0 | 41 | 24 | 28 |
| Q033T0_L<br>ACP3 | LSEI_2<br>829 | 0 | 0 | 0 | 36 | 28 | 29 |
| Q038B8_L<br>ACP3 | LSEI_1<br>681 | 0 | 0 | 0 | 24 | 23 | 26 |
| RL24_LAC<br>P3   | LSEI_2<br>492 | 0 | 0 | 0 | 22 | 20 | 35 |
| RL1_LACP<br>3    | LSEI_2<br>279 | 0 | 0 | 0 | 31 | 23 | 23 |
| RL3_LACP<br>3    | LSEI_2<br>503 | 0 | 0 | 0 | 19 | 33 | 20 |
| RL29_LAC<br>P3   | LSEI_2<br>495 | 0 | 0 | 0 | 19 | 18 | 24 |
| Q034S6_LA<br>CP3 | LSEI_2<br>573 | 0 | 0 | 0 | 22 | 22 | 17 |
| GPSB_LAC<br>P3   | LSEI_1<br>478 | 0 | 0 | 0 | 16 | 19 | 27 |
| RPOA_LA<br>CP3   | LSEI_2<br>477 | 0 | 0 | 0 | 11 | 22 | 26 |
| DNAK_LA<br>CP3   | LSEI_1<br>565 | 0 | 0 | 0 | 15 | 29 | 15 |
| PFKA_LAC<br>P3   | LSEI_1<br>364 | 0 | 0 | 0 | 25 | 17 | 16 |
| RL4_LACP<br>3    | LSEI_2<br>502 | 0 | 0 | 0 | 19 | 19 | 19 |
| Q03BE5_L<br>ACP3 | LSEI_0<br>636 | 0 | 0 | 0 | 13 | 25 | 17 |
| Q03BZ6_L<br>ACP3 | LSEI_0<br>420 | 0 | 0 | 0 | 10 | 21 | 26 |
| RL23_LAC<br>P3   | LSEI_2<br>501 | 0 | 0 | 0 | 11 | 13 | 17 |
| RL22_LAC<br>P3   | LSEI_2<br>498 | 0 | 0 | 0 | 19 | 17 | 15 |
| RL22_LAC<br>P3   | LSEI_2<br>498 | 0 | 0 | 0 | 10 | 19 | 24 |
| RS16_LAC<br>P3   | LSEI_1<br>601 | 0 | 0 | 0 | 16 | 17 | 18 |
| Q037Y5_L<br>ACP3 | LSEI_1<br>714 | 0 | 0 | 0 | 15 | 13 | 18 |
| Q03BE0_L<br>ACP3 | LSEI_0<br>641 | 0 | 0 | 0 | 13 | 16 | 20 |
| Q035A2_L<br>ACP3 | LSEI_2<br>484 | 0 | 0 | 0 | 17 | 13 | 18 |
| DLTC_LAC<br>P3   | LSEI_0<br>796 | 0 | 0 | 0 | 12 | 16 | 18 |

|                  |               |   |   |   |    |    |    |
|------------------|---------------|---|---|---|----|----|----|
| Q03AM4_L<br>ACP3 | LSEI_0<br>949 | 0 | 0 | 0 | 8  | 16 | 20 |
| Q038N9_L<br>ACP3 | LSEI_1<br>559 | 0 | 0 | 0 | 17 | 9  | 15 |
| Y1724_LA<br>CP3  | LSEI_1<br>724 | 0 | 0 | 0 | 12 | 13 | 15 |
| Q039N5_L<br>ACP3 | LSEI_1<br>306 | 0 | 0 | 0 | 13 | 12 | 12 |
| Q03A40_L<br>ACP3 | LSEI_1<br>142 | 0 | 0 | 0 | 15 | 8  | 10 |
| SYT_LACP<br>3    | LSEI_1<br>703 | 0 | 0 | 0 | 8  | 11 | 14 |
| Q034P8_LA<br>CP3 | LSEI_2<br>603 | 0 | 0 | 0 | 7  | 16 | 16 |
| Q037P4_LA<br>CP3 | LSEI_1<br>808 | 0 | 0 | 0 | 11 | 14 | 11 |
| RL20_LAC<br>P3   | LSEI_1<br>697 | 0 | 0 | 0 | 10 | 12 | 17 |
| Q034Q4_L<br>ACP3 | LSEI_2<br>597 | 0 | 0 | 0 | 9  | 16 | 13 |
| Q03C19_L<br>ACP3 | LSEI_0<br>397 | 0 | 0 | 0 | 10 | 9  | 10 |
| Q039F6_LA<br>CP3 | LSEI_1<br>388 | 0 | 0 | 0 | 11 | 8  | 11 |
| Q03CJ0_LA<br>CP3 | LSEI_0<br>219 | 0 | 0 | 0 | 9  | 6  | 9  |
| S6CJH9_L<br>ACCA | LBCZ_<br>1372 | 0 | 0 | 0 | 7  | 11 | 8  |
| CLPP_LAC<br>P3   | LSEI_0<br>963 | 0 | 0 | 0 | 6  | 8  | 7  |
| Y1022_LA<br>CP3  | LSEI_1<br>022 | 0 | 0 | 0 | 5  | 9  | 6  |
| S6C9V3_L<br>ACCA | LBCZ_<br>0884 | 0 | 0 | 0 | 5  | 5  | 2  |
| RPOB_LAC<br>P3   | LSEI_2<br>516 | 0 | 0 | 0 | 4  | 7  | 6  |
| SYE_LACP<br>3    | LSEI_2<br>313 | 0 | 0 | 0 | 7  | 4  | 8  |
| Q035W3_L<br>ACP3 | LSEI_2<br>265 | 0 | 0 | 0 | 3  | 8  | 6  |
| Q03AL8_L<br>ACP3 | LSEI_0<br>955 | 0 | 0 | 0 | 5  | 5  | 6  |
| Q038F2_LA<br>CP3 | LSEI_1<br>646 | 0 | 0 | 0 | 4  | 4  | 7  |
| Q034W7_L<br>ACP3 | LSEI_2<br>532 | 0 | 0 | 0 | 5  | 4  | 5  |

|                  |               |   |   |   |    |    |    |
|------------------|---------------|---|---|---|----|----|----|
| Q039M8_L<br>ACP3 | LSEI_1<br>313 | 0 | 0 | 0 | 3  | 5  | 3  |
| Q035A4_L<br>ACP3 | LSEI_2<br>482 | 0 | 0 | 0 | 4  | 4  | 3  |
| ATPF_LAC<br>P3   | LSEI_1<br>162 | 0 | 0 | 0 | 4  | 4  | 5  |
| Q033T2_L<br>ACP3 | LSEI_2<br>827 | 0 | 0 | 0 | 6  | 3  | 3  |
| Q039T3_L<br>ACP3 | LSEI_1<br>255 | 0 | 0 | 0 | 4  | 2  | 2  |
| Q03B95_L<br>ACP3 | LSEI_0<br>687 | 0 | 0 | 0 | 2  | 3  | 3  |
| Q03A10_L<br>ACP3 | LSEI_1<br>174 | 0 | 0 | 0 | 2  | 5  | 4  |
| Q037U1_L<br>ACP3 | LSEI_1<br>759 | 0 | 0 | 0 | 3  | 2  | 2  |
| ATPD_LAC<br>P3   | LSEI_1<br>163 | 0 | 0 | 0 | 1  | 3  | 2  |
| Q03AX7_L<br>ACP3 | LSEI_0<br>809 | 0 | 0 | 0 | 2  | 3  | 4  |
| Q039N6_L<br>ACP3 | LSEI_1<br>305 | 0 | 0 | 0 | 1  | 2  | 3  |
| Q03BU1_L<br>ACP3 | LSEI_0<br>480 | 0 | 0 | 0 | 2  | 2  | 2  |
| Q03B87_L<br>ACP3 | LSEI_0<br>695 | 0 | 0 | 0 | 2  | 1  | 2  |
| Q03BD8_L<br>ACP3 | LSEI_0<br>643 | 0 | 0 | 0 | 1  | 2  | 2  |
| Q03B32_L<br>ACP3 | LSEI_0<br>754 | 0 | 0 | 0 | 1  | 1  | 1  |
| Q039P1_LA<br>CP3 | LSEI_1<br>298 | 0 | 0 | 0 | 1  | 1  | 1  |
| RL13_LAC<br>P3   | LSEI_2<br>463 | 0 | 0 | 0 | 58 | 20 | 5  |
| RS10_LAC<br>P3   | LSEI_2<br>504 | 0 | 0 | 0 | 14 | 21 | 55 |
| RL17_LAC<br>P3   | LSEI_2<br>476 | 0 | 0 | 0 | 9  | 16 | 44 |
| RS4_LACP<br>3    | LSEI_1<br>244 | 0 | 0 | 0 | 12 | 38 | 21 |
| RS6_LACP<br>3    | LSEI_0<br>009 | 0 | 0 | 0 | 37 | 16 | 7  |
| RS17_LAC<br>P3   | LSEI_2<br>494 | 0 | 0 | 0 | 3  | 25 | 34 |
| S6C4R9_L<br>ACCA | LBCZ_<br>0011 | 0 | 0 | 0 | 2  | 35 | 14 |

|                  |               |   |   |   |    |    |    |
|------------------|---------------|---|---|---|----|----|----|
| Q038N2_L<br>ACP3 | LSEI_1<br>566 | 0 | 0 | 0 | 7  | 9  | 23 |
| EFTS_LAC<br>P3   | LSEI_1<br>585 | 0 | 0 | 0 | 4  | 12 | 15 |
| Q03AF7_L<br>ACP3 | LSEI_1<br>019 | 0 | 0 | 0 | 4  | 14 | 10 |
| Q034Q3_L<br>ACP3 | LSEI_2<br>598 | 0 | 0 | 0 | 18 | 3  | 2  |
| Q039R4_L<br>ACP3 | LSEI_1<br>275 | 0 | 0 | 0 | 14 | 5  | 4  |
| Q03CL8_L<br>ACP3 | LSEI_0<br>191 | 0 | 0 | 0 | 3  | 10 | 4  |
| Q03C04_L<br>ACP3 | LSEI_0<br>412 | 0 | 0 | 0 | 2  | 5  | 9  |
| RPOC_LAC<br>P3   | LSEI_2<br>515 | 0 | 0 | 0 | 6  | 3  | 10 |
| Q035P9_LA<br>CP3 | LSEI_2<br>329 | 0 | 0 | 0 | 3  | 9  | 4  |
| Q03BQ5_L<br>ACP3 | LSEI_0<br>517 | 0 | 0 | 0 | 0  | 17 | 1  |
| METK_LA<br>CP3   | LSEI_0<br>877 | 0 | 0 | 0 | 10 | 1  | 6  |
| Q033V0_L<br>ACP3 | LSEI_2<br>808 | 0 | 0 | 0 | 1  | 3  | 6  |
| Q03AP5_L<br>ACP3 | LSEI_0<br>928 | 0 | 0 | 0 | 8  | 0  | 6  |
| RL14_LAC<br>P3   | LSEI_2<br>493 | 0 | 0 | 0 | 1  | 6  | 9  |
| EFG_LACP<br>3    | LSEI_2<br>508 | 0 | 0 | 0 | 10 | 1  | 4  |
| Q039Q5_L<br>ACP3 | LSEI_1<br>284 | 0 | 0 | 0 | 4  | 2  | 10 |
| Q03AZ4_L<br>ACP3 | LSEI_0<br>792 | 0 | 0 | 0 | 5  | 5  | 1  |
| Q03AC1_L<br>ACP3 | LSEI_1<br>057 | 0 | 0 | 0 | 2  | 8  | 3  |
| Q034V9_L<br>ACP3 | LSEI_2<br>540 | 0 | 0 | 0 | 3  | 1  | 2  |
| Q039D9_L<br>ACP3 | LSEI_1<br>405 | 0 | 0 | 0 | 3  | 1  | 2  |
| Q03AI0_LA<br>CP3 | LSEI_0<br>996 | 0 | 0 | 0 | 0  | 3  | 6  |
| Q039R0_L<br>ACP3 | LSEI_1<br>279 | 0 | 0 | 0 | 0  | 4  | 1  |
| Q038C0_L<br>ACP3 | LSEI_1<br>679 | 0 | 0 | 0 | 0  | 5  | 1  |



|                  |               |   |   |   |   |   |   |
|------------------|---------------|---|---|---|---|---|---|
| Q034U8_L<br>ACP3 | LSEI_2<br>551 | 0 | 0 | 0 | 2 | 2 | 0 |
| RL19_LAC<br>P3   | LSEI_1<br>597 | 0 | 0 | 0 | 0 | 1 | 0 |
| Q03AS8_L<br>ACP3 | LSEI_0<br>894 | 0 | 0 | 0 | 3 | 1 | 4 |
| Q036B2_L<br>ACP3 | LSEI_2<br>213 | 0 | 0 | 0 | 0 | 2 | 5 |
| Q036H6_L<br>ACP3 | LSEI_2<br>147 | 0 | 0 | 0 | 6 | 0 | 1 |
| RS12_LAC<br>P3   | LSEI_2<br>510 | 0 | 0 | 0 | 0 | 4 | 1 |
| Y1299_LA<br>CP3  | LSEI_1<br>299 | 0 | 0 | 0 | 3 | 0 | 4 |
| PURA_LA<br>CP3   | LSEI_0<br>122 | 0 | 0 | 0 | 0 | 0 | 1 |
| RL6_LACP<br>3    | LSEI_2<br>488 | 0 | 0 | 0 | 0 | 3 | 2 |
| Q034P8_LA<br>CP3 | LSEI_2<br>603 | 0 | 0 | 0 | 1 | 1 | 4 |
| Q034P5_LA<br>CP3 | LSEI_2<br>607 | 0 | 0 | 0 | 0 | 2 | 1 |
| Q03B16_L<br>ACP3 | LSEI_0<br>770 | 0 | 0 | 0 | 3 | 1 | 1 |
| Q039J6_LA<br>CP3 | LSEI_1<br>347 | 0 | 0 | 0 | 1 | 1 | 2 |
| Q038U7_L<br>ACP3 | LSEI_1<br>499 | 0 | 0 | 0 | 2 | 0 | 2 |
| RS3_LACP<br>3    | LSEI_2<br>497 | 0 | 0 | 0 | 0 | 2 | 1 |
| Q03D54_L<br>ACP3 | LSEI_0<br>002 | 0 | 0 | 0 | 1 | 2 | 0 |
| Q035W6_L<br>ACP3 | LSEI_2<br>262 | 0 | 0 | 0 | 0 | 0 | 2 |
| RS19_LAC<br>P3   | LSEI_2<br>499 | 0 | 0 | 0 | 0 | 0 | 4 |
| Q03A05_L<br>ACP3 | LSEI_1<br>180 | 0 | 0 | 0 | 2 | 0 | 1 |
| NAGB_LA<br>CP3   | LSEI_2<br>889 | 0 | 0 | 0 | 0 | 2 | 1 |
| Q038E7_L<br>ACP3 | LSEI_1<br>652 | 0 | 0 | 0 | 1 | 0 | 1 |
| COAA_LA<br>CP3   | LSEI_1<br>980 | 0 | 0 | 0 | 0 | 1 | 0 |
| Q03BY3_L<br>ACP3 | LSEI_0<br>433 | 0 | 0 | 0 | 2 | 0 | 0 |

|          |        |   |   |   |   |   |   |
|----------|--------|---|---|---|---|---|---|
| Q038X9_L | LSEI_1 | 0 | 0 | 0 | 0 | 2 | 0 |
| ACP3     | 465    |   |   |   |   |   |   |
| MECA_LA  | LSEI_1 | 0 | 0 | 0 | 1 | 1 | 0 |
| CP3      | 734    |   |   |   |   |   |   |
| Q038M2_L | LSEI_1 | 0 | 0 | 0 | 0 | 1 | 1 |
| ACP3     | 576    |   |   |   |   |   |   |
| GLMM_LA  | LSEI_1 | 0 | 0 | 0 | 1 | 0 | 0 |
| CP3      | 018    |   |   |   |   |   |   |
