# Supplementary material for: Isolation and characterization of Lactobacillus-derived membrane vesicles
Source: PubMed Central journal article supplement (PMC6351534; doi:10.1038/s41598-018-37120-6), 2019-01-29
Supplement: 41598_2018_37120_MOESM4_ESM.pdf [file 41598_2018_37120_MOESM4_ESM.pdf]

**Table S3.** List of proteins identified in MVs and pellet *Lactobacillus reuteri*.

| Uniprot ID       | Locus ID      | MV sample 1 | MV sample 2 | MV sample 3 | Pellet sample 1 | Pellet sample 2 | Pellet sample 3 |
|------------------|---------------|-------------|-------------|-------------|-----------------|-----------------|-----------------|
| A5VIM1_LA<br>CRD | Lreu_0<br>426 | 223         | 137         | 318         | 25              | 41              | 52              |
| A5VI92_LA<br>CRD | Lreu_0<br>296 | 111         | 69          | 99          | 70              | 105             | 94              |
| A5VML7_L<br>ACRD | Lreu_1<br>853 | 94          | 31          | 121         | 8               | 4               | 9               |
| OTC_LACR<br>D    | arcB          | 0           | 0           | 129         | 127             | 124             | 113             |
| A5VJJ1_LA<br>CRD | Lreu_0<br>751 | 43          | 0           | 76          | 119             | 120             | 154             |
| A5VHI2_LA<br>CRD | Lreu_0<br>030 | 34          | 0           | 83          | 132             | 102             | 123             |
| NADK_LAC<br>RD   | nadK          | 68          | 0           | 0           | 0               | 0               | 0               |
| A5VIP4_LA<br>CRD | Lreu_0<br>450 | 60          | 0           | 0           | 0               | 0               | 0               |
| A5VKT5_LA<br>CRD | Lreu_1<br>202 | 0           | 0           | 53          | 43              | 24              | 35              |
| A5VM86_L<br>ACRD | cobD          | 34          | 0           | 0           | 0               | 0               | 0               |
| A5VKG9_L<br>ACRD | Lreu_1<br>086 | 17          | 15          | 0           | 0               | 0               | 0               |
| A5VI82_LA<br>CRD | Lreu_0<br>286 | 26          | 0           | 0           | 0               | 0               | 0               |
| CH60_LACR<br>D   | groL          | 0           | 0           | 23          | 179             | 211             | 203             |
| A5VKN8_L<br>ACRD | ffh           | 17          | 0           | 0           | 2               | 0               | 3               |
| A5VLR9_LA<br>CRD | Lreu_1<br>548 | 17          | 0           | 0           | 0               | 0               | 0               |
| A5VKJ0_LA<br>CRD | Lreu_1<br>107 | 17          | 0           | 0           | 0               | 0               | 0               |
| A5VJF6_LA<br>CRD | ldh           | 0           | 0           | 15          | 76              | 47              | 77              |
| EFTU_LAC<br>RD   | tuf           | 0           | 0           | 0           | 1033            | 871             | 864             |
| A5VM51_L<br>ACRD | Lreu_1<br>686 | 0           | 0           | 0           | 446             | 411             | 507             |
| A5VJK5_LA<br>CRD | Lreu_0<br>765 | 0           | 0           | 0           | 492             | 437             | 336             |
| A5VMD1_L<br>ACRD | Lreu_1<br>766 | 0           | 0           | 0           | 358             | 298             | 403             |

|                  |               |   |   |   |     |     |     |
|------------------|---------------|---|---|---|-----|-----|-----|
| A5VL58_LA<br>CRD | Lreu_1<br>325 | 0 | 0 | 0 | 252 | 205 | 119 |
| A5VHJ7_LA<br>CRD | Lreu_0<br>045 | 0 | 0 | 0 | 157 | 174 | 176 |
| A5VJK3_LA<br>CRD | Lreu_0<br>763 | 0 | 0 | 0 | 135 | 210 | 107 |
| A5VMA6_L<br>ACRD | Lreu_1<br>741 | 0 | 0 | 0 | 136 | 133 | 133 |
| A5VI89_LA<br>CRD | Lreu_0<br>293 | 0 | 0 | 0 | 170 | 83  | 105 |
| RL7_LACR<br>D    | rplL          | 0 | 0 | 0 | 119 | 173 | 55  |
| A5VIB7_LA<br>CRD | Lreu_0<br>321 | 0 | 0 | 0 | 101 | 92  | 127 |
| RL17_LACR<br>D   | rplQ          | 0 | 0 | 0 | 141 | 113 | 56  |
| EFG_LACR<br>D    | fusA          | 0 | 0 | 0 | 110 | 104 | 84  |
| TIG_LACRD        | tig           | 0 | 0 | 0 | 110 | 105 | 89  |
| A5VMB2_L<br>ACRD | Lreu_1<br>747 | 0 | 0 | 0 | 84  | 76  | 87  |
| RL2_LACR<br>D    | rplB          | 0 | 0 | 0 | 81  | 130 | 49  |
| A5VHS5_LA<br>CRD | pyrE          | 0 | 0 | 0 | 74  | 64  | 105 |
| A5VMD0_L<br>ACRD | zwf           | 0 | 0 | 0 | 82  | 59  | 72  |
| A5VMA0_L<br>ACRD | Lreu_1<br>735 | 0 | 0 | 0 | 85  | 57  | 75  |
| A5VMB4_L<br>ACRD | Lreu_1<br>749 | 0 | 0 | 0 | 40  | 126 | 60  |
| A5VLL8_LA<br>CRD | Lreu_1<br>496 | 0 | 0 | 0 | 36  | 64  | 118 |
| DNAK_LAC<br>RD   | dnaK          | 0 | 0 | 0 | 57  | 70  | 72  |
| A5VMA1_L<br>ACRD | Lreu_1<br>736 | 0 | 0 | 0 | 52  | 35  | 93  |
| A5VLS2_LA<br>CRD | Lreu_1<br>553 | 0 | 0 | 0 | 69  | 44  | 69  |
| Y1268_LAC<br>RD  | Lreu_1<br>268 | 0 | 0 | 0 | 48  | 76  | 65  |
| PYRB_LAC<br>RD   | pyrB          | 0 | 0 | 0 | 65  | 48  | 73  |
| A5VIA5_LA<br>CRD | rplA          | 0 | 0 | 0 | 60  | 71  | 49  |

|                  |               |   |   |   |    |    |    |
|------------------|---------------|---|---|---|----|----|----|
| A5VM99_L<br>ACRD | Lreu_1<br>734 | 0 | 0 | 0 | 70 | 33 | 77 |
| RL5_LACR<br>D    | rplE          | 0 | 0 | 0 | 58 | 41 | 80 |
| SYR_LACR<br>D    | argS          | 0 | 0 | 0 | 58 | 54 | 62 |
| ATPB_LAC<br>RD   | atpD          | 0 | 0 | 0 | 77 | 54 | 45 |
| RL13_LACR<br>D   | rplM          | 0 | 0 | 0 | 41 | 45 | 91 |
| ATPA_LAC<br>RD   | atpA          | 0 | 0 | 0 | 44 | 47 | 61 |
| A5VL40_LA<br>CRD | Lreu_1<br>307 | 0 | 0 | 0 | 52 | 53 | 45 |
| RS2_LACRD        | rpsB          | 0 | 0 | 0 | 48 | 48 | 67 |
| RL10_LACR<br>D   | rplJ          | 0 | 0 | 0 | 56 | 62 | 40 |
| RBSD_LAC<br>RD   | rbsD          | 0 | 0 | 0 | 65 | 58 | 21 |
| RS7_LACRD        | rpsG          | 0 | 0 | 0 | 32 | 65 | 41 |
| A5VIT0_LA<br>CRD | Lreu_0<br>486 | 0 | 0 | 0 | 59 | 41 | 35 |
| A5VMN8_L<br>ACRD | Lreu_1<br>875 | 0 | 0 | 0 | 33 | 85 | 35 |
| A5VHQ0_L<br>ACRD | Lreu_0<br>102 | 0 | 0 | 0 | 42 | 61 | 41 |
| A5VM57_L<br>ACRD | Lreu_1<br>692 | 0 | 0 | 0 | 37 | 34 | 36 |
| RS4_LACRD        | rpsD          | 0 | 0 | 0 | 31 | 34 | 47 |
| A5VHY0_L<br>ACRD | Lreu_0<br>184 | 0 | 0 | 0 | 37 | 27 | 51 |
| EFTS_LACR<br>D   | tsf           | 0 | 0 | 0 | 23 | 51 | 44 |
| A5VL73_LA<br>CRD | Lreu_1<br>346 | 0 | 0 | 0 | 47 | 31 | 38 |
| A5VIJ3_LA<br>CRD | Lreu_0<br>398 | 0 | 0 | 0 | 37 | 42 | 36 |
| RS3_LACRD        | rpsC          | 0 | 0 | 0 | 36 | 31 | 46 |
| A5VMB0_L<br>ACRD | Lreu_1<br>745 | 0 | 0 | 0 | 37 | 50 | 40 |
| A5VJ73_LA<br>CRD | Lreu_0<br>632 | 0 | 0 | 0 | 28 | 34 | 40 |
| RL11_LACR<br>D   | rplK          | 0 | 0 | 0 | 45 | 47 | 30 |
| A5VL24_LA<br>CRD | Lreu_1<br>291 | 0 | 0 | 0 | 40 | 36 | 32 |

|                  |               |   |   |   |    |    |    |
|------------------|---------------|---|---|---|----|----|----|
| A5VL46_LA<br>CRD | Lreu_1<br>313 | 0 | 0 | 0 | 29 | 24 | 39 |
| CH10_LACR<br>D   | groS          | 0 | 0 | 0 | 23 | 36 | 46 |
| RPOC_LAC<br>RD   | rpoC          | 0 | 0 | 0 | 38 | 17 | 33 |
| RL18_LACR<br>D   | rplR          | 0 | 0 | 0 | 24 | 31 | 37 |
| RPOA_LAC<br>RD   | rpoA          | 0 | 0 | 0 | 27 | 31 | 42 |
| A5VMB1_L<br>ACRD | Lreu_1<br>746 | 0 | 0 | 0 | 32 | 36 | 28 |
| ARCA_LAC<br>RD   | arcA          | 0 | 0 | 0 | 36 | 30 | 31 |
| A5VJ72_LA<br>CRD | Lreu_0<br>631 | 0 | 0 | 0 | 43 | 15 | 30 |
| RS8_LACRD        | rpsH          | 0 | 0 | 0 | 33 | 22 | 20 |
| A5VJ74_LA<br>CRD | Lreu_0<br>633 | 0 | 0 | 0 | 25 | 25 | 30 |
| A5VJ75_LA<br>CRD | Lreu_0<br>634 | 0 | 0 | 0 | 31 | 26 | 28 |
| RS5_LACRD        | rpsE          | 0 | 0 | 0 | 24 | 27 | 30 |
| A5VL18_LA<br>CRD | rbsK          | 0 | 0 | 0 | 23 | 20 | 30 |
| EFP_LACRD        | efp           | 0 | 0 | 0 | 27 | 35 | 22 |
| A5VLZ7_LA<br>CRD | Lreu_1<br>631 | 0 | 0 | 0 | 25 | 22 | 28 |
| RL15_LACR<br>D   | rplO          | 0 | 0 | 0 | 20 | 34 | 23 |
| RS19_LACR<br>D   | rpsS          | 0 | 0 | 0 | 30 | 42 | 13 |
| RL3_LACR<br>D    | rplC          | 0 | 0 | 0 | 29 | 22 | 28 |
| A5VI91_LA<br>CRD | Lreu_0<br>295 | 0 | 0 | 0 | 30 | 19 | 31 |
| RRF_LACR<br>D    | fir           | 0 | 0 | 0 | 18 | 30 | 22 |
| A5VMM7_L<br>ACRD | thrS          | 0 | 0 | 0 | 22 | 27 | 23 |
| A5VJM5_LA<br>CRD | Lreu_0<br>785 | 0 | 0 | 0 | 20 | 31 | 21 |
| A5VHS2_LA<br>CRD | pyrC          | 0 | 0 | 0 | 28 | 18 | 27 |
| A5VIY3_LA<br>CRD | Lreu_0<br>539 | 0 | 0 | 0 | 21 | 30 | 28 |

|                  |               |   |   |   |    |    |    |
|------------------|---------------|---|---|---|----|----|----|
| A5VMF7_L<br>ACRD | Lreu_1<br>792 | 0 | 0 | 0 | 25 | 28 | 25 |
| A5VHZ8_LA<br>CRD | Lreu_0<br>202 | 0 | 0 | 0 | 16 | 34 | 26 |
| A5VHU4_L<br>ACRD | gpmA          | 0 | 0 | 0 | 24 | 20 | 30 |
| A5VJG9_LA<br>CRD | Lreu_0<br>729 | 0 | 0 | 0 | 19 | 30 | 22 |
| RL6_LACR<br>D    | rplF          | 0 | 0 | 0 | 21 | 13 | 24 |
| RS13_LACR<br>D   | rpsM          | 0 | 0 | 0 | 18 | 21 | 19 |
| G6PI_LACR<br>D   | pgi           | 0 | 0 | 0 | 21 | 28 | 10 |
| A5VK26_LA<br>CRD | Lreu_0<br>938 | 0 | 0 | 0 | 19 | 25 | 24 |
| RL31B_LACR<br>RD | rpmE2         | 0 | 0 | 0 | 19 | 38 | 13 |
| A5VIG7_LA<br>CRD | Lreu_0<br>372 | 0 | 0 | 0 | 22 | 19 | 26 |
| A5VMU1_L<br>ACRD | Lreu_1<br>933 | 0 | 0 | 0 | 20 | 18 | 23 |
| RPOB_LACR<br>RD  | rpoB          | 0 | 0 | 0 | 23 | 13 | 19 |
| A5VK77_LA<br>CRD | acpP          | 0 | 0 | 0 | 26 | 21 | 13 |
| RL20_LACR<br>D   | rplT          | 0 | 0 | 0 | 18 | 18 | 24 |
| RL23_LACR<br>D   | rplW          | 0 | 0 | 0 | 16 | 14 | 22 |
| A5VMK5_L<br>ACRD | Lreu_1<br>840 | 0 | 0 | 0 | 13 | 16 | 28 |
| RL16_LACR<br>D   | rplP          | 0 | 0 | 0 | 18 | 22 | 20 |
| RS10_LACR<br>D   | rpsJ          | 0 | 0 | 0 | 15 | 13 | 14 |
| A5VMP6_L<br>ACRD | Lreu_1<br>883 | 0 | 0 | 0 | 23 | 14 | 13 |
| A5VLH2_LA<br>CRD | rpsI          | 0 | 0 | 0 | 25 | 19 | 14 |
| UPP_LACR<br>D    | upp           | 0 | 0 | 0 | 17 | 19 | 22 |
| RL22_LACR<br>D   | rplV          | 0 | 0 | 0 | 20 | 14 | 13 |
| Y552_LACR<br>D   | Lreu_0<br>552 | 0 | 0 | 0 | 11 | 15 | 17 |

|                  |               |   |   |   |    |    |    |
|------------------|---------------|---|---|---|----|----|----|
| A5VLH1_LA<br>CRD | Lreu_1<br>449 | 0 | 0 | 0 | 18 | 18 | 23 |
| A5VKF5_LA<br>CRD | Lreu_1<br>072 | 0 | 0 | 0 | 15 | 18 | 21 |
| RS6_LACRD        | rpsF          | 0 | 0 | 0 | 14 | 11 | 19 |
| A5VJI4_LA<br>CRD | Lreu_0<br>744 | 0 | 0 | 0 | 18 | 13 | 20 |
| A5VKU7_L<br>ACRD | greA          | 0 | 0 | 0 | 10 | 19 | 28 |
| GUAA_LAC<br>RD   | guaA          | 0 | 0 | 0 | 18 | 12 | 25 |
| A5VJ04_LA<br>CRD | ackA          | 0 | 0 | 0 | 16 | 22 | 14 |
| GPSB_LAC<br>RD   | gpsB          | 0 | 0 | 0 | 10 | 27 | 15 |
| ATPF_LACR<br>D   | atpF          | 0 | 0 | 0 | 12 | 18 | 25 |
| A5VM23_L<br>ACRD | Lreu_1<br>658 | 0 | 0 | 0 | 8  | 19 | 29 |
| A5VMA9_L<br>ACRD | Lreu_1<br>744 | 0 | 0 | 0 | 12 | 14 | 19 |
| A5VIH5_LA<br>CRD | Lreu_0<br>380 | 0 | 0 | 0 | 12 | 13 | 20 |
| A5VJ78_LA<br>CRD | Lreu_0<br>637 | 0 | 0 | 0 | 17 | 10 | 21 |
| A5VKT9_LA<br>CRD | Lreu_1<br>206 | 0 | 0 | 0 | 17 | 11 | 15 |
| RS11_LACR<br>D   | rpsK          | 0 | 0 | 0 | 12 | 7  | 18 |
| A5VL23_LA<br>CRD | Lreu_1<br>290 | 0 | 0 | 0 | 13 | 18 | 15 |
| A5VII7_LA<br>CRD | prs           | 0 | 0 | 0 | 16 | 15 | 20 |
| A5VL60_LA<br>CRD | Lreu_1<br>327 | 0 | 0 | 0 | 17 | 12 | 18 |
| A5VIC3_LA<br>CRD | Lreu_0<br>327 | 0 | 0 | 0 | 15 | 24 | 10 |
| A5VID5_LA<br>CRD | Lreu_0<br>339 | 0 | 0 | 0 | 8  | 7  | 14 |
| DEOB_LAC<br>RD   | deoB          | 0 | 0 | 0 | 14 | 16 | 13 |
| RS12_LACR<br>D   | rpsL          | 0 | 0 | 0 | 13 | 15 | 18 |
| A5VI67_LA<br>CRD | lysS          | 0 | 0 | 0 | 14 | 18 | 14 |

|                  |               |   |   |   |    |    |    |
|------------------|---------------|---|---|---|----|----|----|
| A5VLI4_LA<br>CRD | adk           | 0 | 0 | 0 | 16 | 18 | 12 |
| A5VLN1_LA<br>CRD | Lreu_1<br>510 | 0 | 0 | 0 | 7  | 19 | 15 |
| A5VJ36_LA<br>CRD | ftsZ          | 0 | 0 | 0 | 12 | 12 | 16 |
| RL27_LACR<br>D   | rpmA          | 0 | 0 | 0 | 11 | 10 | 22 |
| A5VJ40_LA<br>CRD | Lreu_0<br>597 | 0 | 0 | 0 | 10 | 15 | 9  |
| RS20_LACR<br>D   | rpsT          | 0 | 0 | 0 | 11 | 15 | 19 |
| A5VJD7_LA<br>CRD | nusA          | 0 | 0 | 0 | 16 | 12 | 12 |
| A5VHR4_L<br>ACRD | Lreu_0<br>116 | 0 | 0 | 0 | 13 | 15 | 14 |
| A5VKR9_L<br>ACRD | Lreu_1<br>186 | 0 | 0 | 0 | 11 | 12 | 19 |
| A5VLJ6_LA<br>CRD | rpsQ          | 0 | 0 | 0 | 7  | 23 | 14 |
| RL4_LACR<br>D    | rplD          | 0 | 0 | 0 | 11 | 11 | 15 |
| RPOZ_LAC<br>RD   | rpoZ          | 0 | 0 | 0 | 10 | 16 | 16 |
| A5VIZ2_LA<br>CRD | Lreu_0<br>548 | 0 | 0 | 0 | 13 | 18 | 10 |
| SYE_LACR<br>D    | gltX          | 0 | 0 | 0 | 15 | 13 | 12 |
| A5VHS4_LA<br>CRD | pyrF          | 0 | 0 | 0 | 17 | 15 | 8  |
| A5VJH0_LA<br>CRD | Lreu_0<br>730 | 0 | 0 | 0 | 7  | 13 | 20 |
| A5VML5_L<br>ACRD | Lreu_1<br>851 | 0 | 0 | 0 | 16 | 16 | 10 |
| A5VLR7_LA<br>CRD | Lreu_1<br>546 | 0 | 0 | 0 | 14 | 14 | 13 |
| DEOD_LAC<br>RD   | deoD          | 0 | 0 | 0 | 14 | 7  | 20 |
| RS16_LACR<br>D   | rpsP          | 0 | 0 | 0 | 13 | 24 | 7  |
| A5VI26_LA<br>CRD | pyrG          | 0 | 0 | 0 | 6  | 4  | 7  |
| RL29_LACR<br>D   | rpmC          | 0 | 0 | 0 | 6  | 13 | 9  |
| A5VM16_L<br>ACRD | Lreu_1<br>650 | 0 | 0 | 0 | 19 | 7  | 10 |

|                  |               |   |   |   |    |    |    |
|------------------|---------------|---|---|---|----|----|----|
| A5VHQ9_L<br>ACRD | deoC          | 0 | 0 | 0 | 14 | 13 | 8  |
| A5VIF9_LA<br>CRD | hpf           | 0 | 0 | 0 | 9  | 12 | 14 |
| A5VK68_LA<br>CRD | Lreu_0<br>981 | 0 | 0 | 0 | 10 | 6  | 17 |
| A5VHX8_L<br>ACRD | Lreu_0<br>182 | 0 | 0 | 0 | 10 | 11 | 17 |
| SYL_LACR<br>D    | leuS          | 0 | 0 | 0 | 7  | 5  | 3  |
| A5VKY4_L<br>ACRD | Lreu_1<br>251 | 0 | 0 | 0 | 8  | 11 | 7  |
| A5VM24_L<br>ACRD | Lreu_1<br>659 | 0 | 0 | 0 | 10 | 6  | 13 |
| SYN_LACR<br>D    | asnS          | 0 | 0 | 0 | 8  | 5  | 9  |
| PYRDA_LA<br>CRD  | pyrD          | 0 | 0 | 0 | 13 | 10 | 11 |
| A5VMP4_L<br>ACRD | Lreu_1<br>881 | 0 | 0 | 0 | 14 | 6  | 10 |
| A5VJ10_LA<br>CRD | Lreu_0<br>566 | 0 | 0 | 0 | 10 | 7  | 17 |
| A5VMD4_L<br>ACRD | Lreu_1<br>769 | 0 | 0 | 0 | 13 | 8  | 14 |
| RL9_LACR<br>D    | rplI          | 0 | 0 | 0 | 11 | 12 | 13 |
| A5VLS1_LA<br>CRD | Lreu_1<br>552 | 0 | 0 | 0 | 6  | 10 | 13 |
| A5VMB3_L<br>ACRD | Lreu_1<br>748 | 0 | 0 | 0 | 8  | 16 | 9  |
| A5VM98_L<br>ACRD | ackA          | 0 | 0 | 0 | 9  | 8  | 13 |
| RL14_LACR<br>D   | rplN          | 0 | 0 | 0 | 7  | 3  | 8  |
| A5VHK6_L<br>ACRD | Lreu_0<br>054 | 0 | 0 | 0 | 9  | 7  | 10 |
| A5VIX7_LA<br>CRD | alaS          | 0 | 0 | 0 | 11 | 4  | 10 |
| RS21_LACR<br>D   | rpsU          | 0 | 0 | 0 | 8  | 10 | 15 |
| A5VI65_LA<br>CRD | hslO          | 0 | 0 | 0 | 7  | 13 | 9  |
| CLPP_LACR<br>D   | clpP          | 0 | 0 | 0 | 8  | 7  | 3  |
| A5VI06_LA<br>CRD | metG          | 0 | 0 | 0 | 9  | 6  | 9  |



|                  |               |   |   |   |    |    |    |
|------------------|---------------|---|---|---|----|----|----|
| A5VJ21_LA<br>CRD | Lreu_0<br>578 | 0 | 0 | 0 | 5  | 8  | 12 |
| GLYA_LAC<br>RD   | glyA          | 0 | 0 | 0 | 10 | 4  | 14 |
| A5VIV3_LA<br>CRD | Lreu_0<br>509 | 0 | 0 | 0 | 9  | 5  | 11 |
| PYRH_LAC<br>RD   | pyrH          | 0 | 0 | 0 | 7  | 6  | 10 |
| IF1_LACRD        | infA          | 0 | 0 | 0 | 6  | 15 | 6  |
| A5VJ52_LA<br>CRD | prs           | 0 | 0 | 0 | 7  | 5  | 13 |
| A5VI64_LA<br>CRD | ftsH          | 0 | 0 | 0 | 6  | 4  | 9  |
| GATB_LAC<br>RD   | gatB          | 0 | 0 | 0 | 10 | 4  | 9  |
| IF2_LACRD        | infB          | 0 | 0 | 0 | 9  | 3  | 6  |
| A5VIR5_LA<br>CRD | Lreu_0<br>471 | 0 | 0 | 0 | 8  | 2  | 9  |
| A5VM54_L<br>ACRD | Lreu_1<br>689 | 0 | 0 | 0 | 9  | 4  | 8  |
| A5VLR5_LA<br>CRD | Lreu_1<br>544 | 0 | 0 | 0 | 7  | 6  | 6  |
| A5VHP9_LA<br>CRD | Lreu_0<br>101 | 0 | 0 | 0 | 10 | 9  | 4  |
| A5VKX4_L<br>ACRD | infC          | 0 | 0 | 0 | 6  | 8  | 9  |
| A5VLS8_LA<br>CRD | Lreu_1<br>559 | 0 | 0 | 0 | 9  | 2  | 6  |
| A5VKP6_LA<br>CRD | Lreu_1<br>163 | 0 | 0 | 0 | 8  | 4  | 8  |
| A5VHQ7_L<br>ACRD | ychF          | 0 | 0 | 0 | 5  | 9  | 7  |
| ATPD_LAC<br>RD   | atpH          | 0 | 0 | 0 | 6  | 11 | 5  |
| A5VKQ0_L<br>ACRD | Lreu_1<br>167 | 0 | 0 | 0 | 6  | 9  | 7  |
| Y534_LACR<br>D   | Lreu_0<br>534 | 0 | 0 | 0 | 6  | 7  | 6  |
| A5VIH1_LA<br>CRD | Lreu_0<br>376 | 0 | 0 | 0 | 6  | 5  | 10 |
| RPIA_LACR<br>D   | rpiA          | 0 | 0 | 0 | 7  | 7  | 4  |
| A5VHP2_LA<br>CRD | Lreu_0<br>091 | 0 | 0 | 0 | 6  | 6  | 9  |
| A5VLL6_LA<br>CRD | Lreu_1<br>494 | 0 | 0 | 0 | 6  | 2  | 8  |

|                  |               |   |   |   |   |   |   |
|------------------|---------------|---|---|---|---|---|---|
| A5VKW6_L<br>ACRD | rsfS          | 0 | 0 | 0 | 5 | 5 | 4 |
| A5VIA3_LA<br>CRD | nusG          | 0 | 0 | 0 | 6 | 7 | 7 |
| A5VM42_L<br>ACRD | Lreu_1<br>677 | 0 | 0 | 0 | 7 | 6 | 3 |
| A5VJ45_LA<br>CRD | Lreu_0<br>602 | 0 | 0 | 0 | 6 | 4 | 9 |
| A5VHX1_L<br>ACRD | Lreu_0<br>175 | 0 | 0 | 0 | 5 | 5 | 7 |
| A5VMA7_L<br>ACRD | Lreu_1<br>742 | 0 | 0 | 0 | 4 | 5 | 4 |
| SYP_LACR<br>D    | proS          | 0 | 0 | 0 | 6 | 4 | 7 |
| GRPE_LAC<br>RD   | grpE          | 0 | 0 | 0 | 4 | 6 | 6 |
| A5VJY0_LA<br>CRD | Lreu_0<br>891 | 0 | 0 | 0 | 6 | 4 | 6 |
| A5VHF4_LA<br>CRD | Lreu_0<br>002 | 0 | 0 | 0 | 6 | 2 | 7 |
| A5VJI8_LA<br>CRD | pepT          | 0 | 0 | 0 | 4 | 1 | 3 |
| A5VHL5_LA<br>CRD | Lreu_0<br>064 | 0 | 0 | 0 | 6 | 2 | 4 |
| A5VLQ9_LA<br>CRD | Lreu_1<br>538 | 0 | 0 | 0 | 6 | 4 | 2 |
| A5VHW2_L<br>ACRD | Lreu_0<br>164 | 0 | 0 | 0 | 5 | 5 | 6 |
| A5VIZ1_LA<br>CRD | Lreu_0<br>547 | 0 | 0 | 0 | 5 | 6 | 5 |
| A5VLQ5_LA<br>CRD | Lreu_1<br>534 | 0 | 0 | 0 | 3 | 4 | 2 |
| MURC_LAC<br>RD   | murC          | 0 | 0 | 0 | 7 | 3 | 3 |
| A5VL89_LA<br>CRD | Lreu_1<br>364 | 0 | 0 | 0 | 5 | 4 | 5 |
| A5VLG4_LA<br>CRD | gatC          | 0 | 0 | 0 | 5 | 5 | 4 |
| A5VIX6_LA<br>CRD | cshB          | 0 | 0 | 0 | 6 | 4 | 3 |
| DEF_LACR<br>D    | def           | 0 | 0 | 0 | 4 | 5 | 5 |
| A5VIH6_LA<br>CRD | Lreu_0<br>381 | 0 | 0 | 0 | 2 | 2 | 3 |
| A5VKV0_L<br>ACRD | pheT          | 0 | 0 | 0 | 2 | 4 | 6 |

|                  |               |   |   |   |    |    |    |
|------------------|---------------|---|---|---|----|----|----|
| A5VLQ2_LA<br>CRD | fumC          | 0 | 0 | 0 | 6  | 2  | 4  |
| A5VII9_LAC<br>RD | rnr           | 0 | 0 | 0 | 6  | 2  | 2  |
| REX_LACR<br>D    | rex           | 0 | 0 | 0 | 5  | 2  | 4  |
| DDL_LACR<br>D    | ddl           | 0 | 0 | 0 | 5  | 2  | 4  |
| A5VK58_LA<br>CRD | Lreu_0<br>970 | 0 | 0 | 0 | 4  | 3  | 3  |
| A5VKZ8_LA<br>CRD | prsA          | 0 | 0 | 0 | 2  | 2  | 3  |
| A5VHQ1_L<br>ACRD | Lreu_0<br>103 | 0 | 0 | 0 | 4  | 4  | 2  |
| SYC_LACR<br>D    | cysS          | 0 | 0 | 0 | 3  | 1  | 3  |
| A5VMG7_L<br>ACRD | Lreu_1<br>802 | 0 | 0 | 0 | 1  | 4  | 4  |
| A5VIJ9_LA<br>CRD | rbsK          | 0 | 0 | 0 | 25 | 21 | 63 |
| A5VIV6_LA<br>CRD | Lreu_0<br>512 | 0 | 0 | 0 | 35 | 2  | 23 |
| A5VMM4_L<br>ACRD | Lreu_1<br>860 | 0 | 0 | 0 | 10 | 13 | 35 |
| A5VMP5_L<br>ACRD | Lreu_1<br>882 | 0 | 0 | 0 | 10 | 7  | 28 |
| RL19_LACR<br>D   | rplS          | 0 | 0 | 0 | 8  | 5  | 29 |
| PDUL_LAC<br>RD   | pduL          | 0 | 0 | 0 | 6  | 10 | 25 |
| A5VJ90_LA<br>CRD | rnj           | 0 | 0 | 0 | 1  | 0  | 0  |
| A5VIP6_LA<br>CRD | prfA          | 0 | 0 | 0 | 4  | 8  | 0  |
| A5VK46_LA<br>CRD | Lreu_0<br>958 | 0 | 0 | 0 | 13 | 1  | 11 |
| SYGB_LAC<br>RD   | glyS          | 0 | 0 | 0 | 9  | 3  | 16 |
| A5VKP3_LA<br>CRD | acpP          | 0 | 0 | 0 | 6  | 19 | 3  |
| A5VIU8_LA<br>CRD | valS          | 0 | 0 | 0 | 9  | 2  | 15 |
| SYI_LACR<br>D    | tyrS          | 0 | 0 | 0 | 6  | 3  | 16 |
| RS15_LACR<br>D   | rpsO          | 0 | 0 | 0 | 1  | 2  | 8  |

|                  |               |   |   |   |    |    |    |
|------------------|---------------|---|---|---|----|----|----|
| RL28_LACR<br>D   | rpmB          | 0 | 0 | 0 | 3  | 0  | 12 |
| A5VII8_LA<br>CRD | Lreu_0<br>222 | 0 | 0 | 0 | 5  | 7  | 17 |
| RECA_LAC<br>RD   | recA          | 0 | 0 | 0 | 6  | 0  | 10 |
| A5VI90_LA<br>CRD | Lreu_0<br>294 | 0 | 0 | 0 | 0  | 10 | 6  |
| A5VMA2_L<br>ACRD | Lreu_1<br>737 | 0 | 0 | 0 | 5  | 4  | 13 |
| GATA_LAC<br>RD   | gatA          | 0 | 0 | 0 | 11 | 2  | 7  |
| RL24_LACR<br>D   | rplX          | 0 | 0 | 0 | 6  | 0  | 0  |
| ATPG_LAC<br>RD   | atpG          | 0 | 0 | 0 | 5  | 1  | 12 |
| SYD_LACR<br>D    | aspS          | 0 | 0 | 0 | 7  | 0  | 8  |
| RS18_LACR<br>D   | rpsR          | 0 | 0 | 0 | 8  | 5  | 0  |
| A5VMC7_L<br>ACRD | Lreu_1<br>762 | 0 | 0 | 0 | 6  | 4  | 0  |
| RL21_LACR<br>D   | rplU          | 0 | 0 | 0 | 6  | 0  | 7  |
| A5VML1_L<br>ACRD | Lreu_1<br>847 | 0 | 0 | 0 | 6  | 0  | 8  |
| A5VJY4_LA<br>CRD | Lreu_0<br>895 | 0 | 0 | 0 | 9  | 2  | 2  |
| A5VHY2_L<br>ACRD | Lreu_0<br>186 | 0 | 0 | 0 | 6  | 0  | 7  |
| FTHS_LACR<br>D   | fhs           | 0 | 0 | 0 | 8  | 0  | 4  |
| RL30_LACR<br>D   | rpmD          | 0 | 0 | 0 | 0  | 0  | 9  |
| A5VJI3_LA<br>CRD | sigA          | 0 | 0 | 0 | 4  | 8  | 2  |
| A5VKY5_L<br>ACRD | Lreu_1<br>252 | 0 | 0 | 0 | 0  | 7  | 6  |
| A5VJ50_LA<br>CRD | Lreu_0<br>607 | 0 | 0 | 0 | 2  | 12 | 0  |
| A5VM43_L<br>ACRD | Lreu_1<br>678 | 0 | 0 | 0 | 4  | 0  | 6  |
| A5VLB6_LA<br>CRD | Lreu_1<br>391 | 0 | 0 | 0 | 2  | 0  | 5  |
| A5VIZ4_LA<br>CRD | Lreu_0<br>550 | 0 | 0 | 0 | 4  | 0  | 3  |

|                  |               |   |   |   |   |   |   |
|------------------|---------------|---|---|---|---|---|---|
| GSA_LACR<br>D    | hemL          | 0 | 0 | 0 | 5 | 0 | 6 |
| A5VI00_LA<br>CRD | trpS          | 0 | 0 | 0 | 2 | 0 | 8 |
| A5VHP1_LA<br>CRD | Lreu_0<br>090 | 0 | 0 | 0 | 5 | 0 | 7 |
| A5VIS2_LA<br>CRD | Lreu_0<br>478 | 0 | 0 | 0 | 3 | 0 | 6 |
| SYS_LACR<br>D    | serS          | 0 | 0 | 0 | 4 | 2 | 0 |
| A5VK75_LA<br>CRD | Lreu_0<br>988 | 0 | 0 | 0 | 3 | 3 | 0 |
| A5VJ41_LA<br>CRD | ileS          | 0 | 0 | 0 | 5 | 0 | 4 |
| A5VL97_LA<br>CRD | Lreu_1<br>372 | 0 | 0 | 0 | 0 | 3 | 0 |
| A5VJY1_LA<br>CRD | Lreu_0<br>892 | 0 | 0 | 0 | 5 | 0 | 0 |
| A5VJC0_LA<br>CRD | Lreu_0<br>679 | 0 | 0 | 0 | 0 | 5 | 4 |
| A5VM59_L<br>ACRD | Lreu_1<br>694 | 0 | 0 | 0 | 0 | 7 | 0 |
| A5VMD3_L<br>ACRD | Lreu_1<br>768 | 0 | 0 | 0 | 0 | 0 | 3 |
| A5VIK1_LA<br>CRD | Lreu_0<br>406 | 0 | 0 | 0 | 6 | 0 | 2 |
| A5VHG7_L<br>ACRD | Lreu_0<br>015 | 0 | 0 | 0 | 0 | 1 | 6 |
| GPDA_LAC<br>RD   | gpsA          | 0 | 0 | 0 | 3 | 0 | 4 |
| A5VI40_LA<br>CRD | cshA          | 0 | 0 | 0 | 4 | 0 | 7 |
| A5VI48_LA<br>CRD | dltA          | 0 | 0 | 0 | 4 | 0 | 2 |
| GLMM_LAC<br>RD   | glmM          | 0 | 0 | 0 | 1 | 0 | 8 |
| A5VK73_LA<br>CRD | Lreu_0<br>986 | 0 | 0 | 0 | 0 | 7 | 0 |
| A5VJZ9_LA<br>CRD | Lreu_0<br>911 | 0 | 0 | 0 | 2 | 0 | 0 |
| SECA_LAC<br>RD   | secA          | 0 | 0 | 0 | 2 | 0 | 2 |
| A5VHG0_L<br>ACRD | Lreu_0<br>008 | 0 | 0 | 0 | 2 | 3 | 0 |
| A5VK79_LA<br>CRD | Lreu_0<br>992 | 0 | 0 | 0 | 5 | 1 | 0 |

|               |        |   |   |   |   |   |   |
|---------------|--------|---|---|---|---|---|---|
| NADE_LAC RD   | nadE   | 0 | 0 | 0 | 4 | 0 | 0 |
| RBFA_LAC RD   | rbfA   | 0 | 0 | 0 | 0 | 5 | 0 |
| A5VLG8_LAC RD | Lreu_1 | 0 | 0 | 0 | 2 | 0 | 6 |
| CRD           | 446    |   |   |   |   |   |   |
| SYFA_LAC RD   | pheS   | 0 | 0 | 0 | 0 | 4 | 0 |
| A5VKF9_LAC RD | Lreu_1 | 0 | 0 | 0 | 2 | 2 | 0 |
| CRD           | 076    |   |   |   |   |   |   |
| URK_LAC RD    | udk    | 0 | 0 | 0 | 3 | 0 | 3 |
| A5VLM6_LAC RD | Lreu_1 | 0 | 0 | 0 | 2 | 0 | 0 |
| ACRD          | 505    |   |   |   |   |   |   |
| A5VMG2_LAC RD | Lreu_1 | 0 | 0 | 0 | 3 | 0 | 2 |
| ACRD          | 797    |   |   |   |   |   |   |
| A5VHW0_LAC RD | Lreu_0 | 0 | 0 | 0 | 2 | 0 | 2 |
| ACRD          | 162    |   |   |   |   |   |   |
| A5VIU6_LAC RD | Lreu_0 | 0 | 0 | 0 | 3 | 0 | 0 |
| CRD           | 502    |   |   |   |   |   |   |
| A5VLD3_LAC RD | Lreu_1 | 0 | 0 | 0 | 2 | 0 | 0 |
| CRD           | 408    |   |   |   |   |   |   |
| A5VJH8_LAC RD | era    | 0 | 0 | 0 | 2 | 0 | 2 |
| A5VHF5_LAC RD | Lreu_0 | 0 | 0 | 0 | 1 | 0 | 0 |
| CRD           | 003    |   |   |   |   |   |   |
| A5VKT7_LAC RD | Lreu_1 | 0 | 0 | 0 | 0 | 2 | 0 |
| CRD           | 204    |   |   |   |   |   |   |
| A5VI63_LAC RD | Lreu_0 | 0 | 0 | 0 | 1 | 0 | 3 |
| CRD           | 267    |   |   |   |   |   |   |
| A5VMC1_LAC RD | Lreu_1 | 0 | 0 | 0 | 1 | 0 | 3 |
| ACRD          | 756    |   |   |   |   |   |   |
| A5VIA6_LAC RD | Lreu_0 | 0 | 0 | 0 | 3 | 0 | 3 |
| CRD           | 310    |   |   |   |   |   |   |
| A5VL92_LAC RD | Lreu_1 | 0 | 0 | 0 | 0 | 0 | 3 |
| CRD           | 367    |   |   |   |   |   |   |
| A5VLQ1_LAC RD | Lreu_1 | 0 | 0 | 0 | 2 | 0 | 3 |
| CRD           | 530    |   |   |   |   |   |   |
| A5VKQ9_LAC RD | gmk    | 0 | 0 | 0 | 2 | 0 | 4 |
| A5VKU6_LAC RD | Lreu_1 | 0 | 0 | 0 | 2 | 4 | 0 |
| ACRD          | 213    |   |   |   |   |   |   |
| A5VHQ3_LAC RD | Lreu_0 | 0 | 0 | 0 | 1 | 0 | 2 |
| ACRD          | 105    |   |   |   |   |   |   |
| A5VJ35_LAC RD | ftsA   | 0 | 0 | 0 | 3 | 0 | 0 |

|           |        |   |   |   |   |   |   |
|-----------|--------|---|---|---|---|---|---|
| A5VM66_L  | Lreu_1 | 0 | 0 | 0 | 3 | 0 | 1 |
| ACRD      | 701    |   |   |   |   |   |   |
| A5VHK7_L  | Lreu_0 | 0 | 0 | 0 | 0 | 0 | 1 |
| ACRD      | 055    |   |   |   |   |   |   |
| A5VM97_L  | Lreu_1 | 0 | 0 | 0 | 0 | 3 | 0 |
| ACRD      | 732    |   |   |   |   |   |   |
| A5VLS9_LA | Lreu_1 | 0 | 0 | 0 | 3 | 0 | 0 |
| CRD       | 560    |   |   |   |   |   |   |
| A5VLR0_LA | Lreu_1 | 0 | 0 | 0 | 2 | 2 | 0 |
| CRD       | 539    |   |   |   |   |   |   |
| A5VJI0_LA | glyQ   | 0 | 0 | 0 | 2 | 0 | 0 |
| CRD       |        |   |   |   |   |   |   |
| A5VI46_LA | dltC   | 0 | 0 | 0 | 0 | 2 | 0 |
| CRD       |        |   |   |   |   |   |   |
| A5VL99_LA | Lreu_1 | 0 | 0 | 0 | 3 | 0 | 0 |
| CRD       | 374    |   |   |   |   |   |   |
| A5VIT5_LA | Lreu_0 | 0 | 0 | 0 | 0 | 2 | 0 |
| CRD       | 491    |   |   |   |   |   |   |
| XPT_LACR  | xpt    | 0 | 0 | 0 | 0 | 1 | 1 |
| D         |        |   |   |   |   |   |   |
| A5VKE2_LA | Lreu_1 | 0 | 0 | 0 | 1 | 4 | 0 |
| CRD       | 058    |   |   |   |   |   |   |
| A5VK72_LA | fabZ   | 0 | 0 | 0 | 0 | 0 | 3 |
| CRD       |        |   |   |   |   |   |   |
| A5VI93_LA | Lreu_0 | 0 | 0 | 0 | 2 | 0 | 0 |
| CRD       | 297    |   |   |   |   |   |   |
| RF3_LACRD | prfC   | 0 | 0 | 0 | 0 | 1 | 0 |
| A5VKW1_L  | Lreu_1 | 0 | 0 | 0 | 0 | 0 | 2 |
| ACRD      | 228    |   |   |   |   |   |   |
| A5VJK6_LA | Lreu_0 | 0 | 0 | 0 | 0 | 0 | 2 |
| CRD       | 766    |   |   |   |   |   |   |
| A5VMK2_L  | Lreu_1 | 0 | 0 | 0 | 0 | 0 | 2 |
| ACRD      | 837    |   |   |   |   |   |   |
| A5VJD8_LA | Lreu_0 | 0 | 0 | 0 | 2 | 0 | 0 |
| CRD       | 697    |   |   |   |   |   |   |
| A5VKT3_LA | Lreu_1 | 0 | 0 | 0 | 3 | 0 | 2 |
| CRD       | 200    |   |   |   |   |   |   |
| A5VIB9_LA | Lreu_0 | 0 | 0 | 0 | 2 | 1 | 0 |
| CRD       | 323    |   |   |   |   |   |   |
| RISB_LACR | ribH   | 0 | 0 | 0 | 0 | 0 | 2 |
| D         |        |   |   |   |   |   |   |
| A5VIK5_LA | glmS   | 0 | 0 | 0 | 1 | 0 | 0 |
| CRD       |        |   |   |   |   |   |   |
| A5VHR5_L  | Lreu_0 | 0 | 0 | 0 | 0 | 0 | 2 |
| ACRD      | 117    |   |   |   |   |   |   |

|                  |               |   |   |   |   |   |   |
|------------------|---------------|---|---|---|---|---|---|
| DAPA_LAC<br>RD   | dapA          | 0 | 0 | 0 | 0 | 2 | 0 |
| A5VK71_LA<br>CRD | Lreu_0<br>984 | 0 | 0 | 0 | 3 | 0 | 0 |
| MNMA_LA<br>CRD   | mnmA          | 0 | 0 | 0 | 1 | 0 | 1 |
| A5VIZ3_LA<br>CRD | Lreu_0<br>549 | 0 | 0 | 0 | 0 | 2 | 0 |
| A5VK76_LA<br>CRD | Lreu_0<br>989 | 0 | 0 | 0 | 0 | 0 | 2 |
| A5VIR9_LA<br>CRD | Lreu_0<br>475 | 0 | 0 | 0 | 0 | 1 | 0 |
| MURG_LAC<br>RD   | murG          | 0 | 0 | 0 | 0 | 1 | 0 |
| A5VHF8_LA<br>CRD | gyrA          | 0 | 0 | 0 | 2 | 0 | 0 |
| METK_LAC<br>RD   | metK          | 0 | 0 | 0 | 1 | 0 | 2 |
| OBG_LACR<br>D    | obg           | 0 | 0 | 0 | 0 | 0 | 2 |
| A5VL06_LA<br>CRD | Lreu_1<br>273 | 0 | 0 | 0 | 0 | 0 | 3 |
| A5VL78_LA<br>CRD | Lreu_1<br>352 | 0 | 0 | 0 | 1 | 0 | 0 |
| A5VME5_L<br>ACRD | Lreu_1<br>780 | 0 | 0 | 0 | 0 | 0 | 3 |
| A5VL04_LA<br>CRD | Lreu_1<br>271 | 0 | 0 | 0 | 0 | 0 | 2 |
| A5VI39_LA<br>CRD | murF          | 0 | 0 | 0 | 1 | 0 | 0 |
| A5VI32_LA<br>CRD | Lreu_0<br>236 | 0 | 0 | 0 | 1 | 0 | 0 |
| A5VHQ5_L<br>ACRD | Lreu_0<br>107 | 0 | 0 | 0 | 2 | 0 | 0 |
| A5VLN7_LA<br>CRD | rnj           | 0 | 0 | 0 | 1 | 0 | 0 |
| A5VI84_LA<br>CRD | Lreu_0<br>288 | 0 | 0 | 0 | 1 | 0 | 0 |
| A5VI85_LA<br>CRD | Lreu_0<br>289 | 0 | 0 | 0 | 1 | 0 | 0 |
| A5VIU5_LA<br>CRD | ezrA          | 0 | 0 | 0 | 1 | 0 | 0 |
| A5VHJ4_LA<br>CRD | Lreu_0<br>042 | 0 | 0 | 0 | 1 | 0 | 0 |
| A5VI88_LA<br>CRD | Lreu_0<br>292 | 0 | 0 | 0 | 0 | 0 | 1 |



|                  |               |   |   |   |   |   |   |
|------------------|---------------|---|---|---|---|---|---|
| A5VHX0_L<br>ACRD | Lreu_0<br>174 | 0 | 0 | 0 | 1 | 0 | 0 |
| A5VK66_LA<br>CRD | Lreu_0<br>979 | 0 | 0 | 0 | 0 | 1 | 0 |
| GAL1_LAC<br>RD   | galK          | 0 | 0 | 0 | 1 | 0 | 0 |
| A5VKY8_L<br>ACRD | Lreu_1<br>255 | 0 | 0 | 0 | 1 | 0 | 0 |
| LUXS_LAC<br>RD   | luxS          | 0 | 0 | 0 | 1 | 0 | 0 |
| A5VM60_L<br>ACRD | Lreu_1<br>695 | 0 | 0 | 0 | 1 | 0 | 0 |
| A5VME1_L<br>ACRD | galT          | 0 | 0 | 0 | 1 | 0 | 0 |
| A5VI79_LA<br>CRD | Lreu_0<br>283 | 0 | 0 | 0 | 0 | 0 | 1 |
